# Supplementary material for: Effects of polymers on the properties of hydrogels constructed using sodium deoxycholate and amino acid
Source: RSC Adv. 2018 Feb 27;8(16):8699–708. doi: 10.1039/c8ra00171e (PMC9078593; doi:10.1039/c8ra00171e)
Supplement: RA-008-C8RA00171E-s001 [file RA-008-C8RA00171E-s001.xlsx]

## Sheet: Sheet1
	Raw data of Fig.9: 100 mM NaDC/30 mM Asp xerogels (a) without polymer, (b) with 1 g·L-1 P(MEO2MA90-co-OEGMA10) and (c) with 1 g·L-1 CDPDPM
	a		b		c
	2θ		2θ		2θ
	1	1166.67	1	2025	1	933.333
	1.004	1033.33	1.004	2083.33	1.004	950
	1.008	1033.33	1.008	2183.33	1.008	808.333
	1.012	1075	1.012	2041.67	1.012	958.333
	1.016	1225	1.016	2158.33	1.016	883.333
	1.02	866.667	1.02	1941.67	1.02	1025
	1.024	1066.67	1.024	1925	1.024	908.333
	1.028	1083.33	1.028	2041.67	1.028	925
	1.032	1025	1.032	2058.33	1.032	925
	1.036	1066.67	1.036	2108.33	1.036	875
	1.04	941.667	1.04	1966.67	1.04	1000
	1.044	850	1.044	2050	1.044	891.667
	1.048	916.667	1.048	1883.33	1.048	750
	1.052	850	1.052	1675	1.052	816.667
	1.056	975	1.056	1833.33	1.056	825
	1.06	1041.67	1.06	1675	1.06	791.667
	1.064	808.333	1.064	1941.67	1.064	883.333
	1.068	758.333	1.068	1725	1.068	841.667
	1.072	875	1.072	1433.33	1.072	800
	1.076	875	1.076	1600	1.076	825
	1.08	925	1.08	1633.33	1.08	833.333
	1.084	775	1.084	1516.67	1.084	866.667
	1.088	775	1.088	1516.67	1.088	841.667
	1.092	766.667	1.092	1433.33	1.092	866.667
	1.096	833.333	1.096	1441.67	1.096	766.667
	1.1	625	1.1	1375	1.1	708.333
	1.104	741.667	1.104	1358.33	1.104	791.667
	1.108	666.667	1.108	1400	1.108	708.333
	1.112	691.667	1.112	1241.67	1.112	791.667
	1.116	908.333	1.116	1300	1.116	708.333
	1.12	758.333	1.12	1408.33	1.12	675
	1.124	733.333	1.124	1200	1.124	641.667
	1.128	725	1.128	1241.67	1.128	691.667
	1.132	708.333	1.132	1391.67	1.132	775
	1.136	641.667	1.136	1100	1.136	825
	1.14	600	1.14	1258.33	1.14	758.333
	1.144	658.333	1.144	966.667	1.144	758.333
	1.148	658.333	1.148	1208.33	1.148	716.667
	1.152	700	1.152	1100	1.152	733.333
	1.156	666.667	1.156	1050	1.156	708.333
	1.16	633.333	1.16	1166.67	1.16	750
	1.164	583.333	1.164	1000	1.164	741.667
	1.168	658.333	1.168	1008.33	1.168	791.667
	1.172	658.333	1.172	883.333	1.172	616.667
	1.176	516.667	1.176	933.333	1.176	650
	1.18	575	1.18	1008.33	1.18	716.667
	1.184	583.333	1.184	875	1.184	591.667
	1.188	541.667	1.188	1008.33	1.188	725
	1.192	416.667	1.192	833.333	1.192	675
	1.196	533.333	1.196	1016.67	1.196	633.333
	1.2	550	1.2	850	1.2	650
	1.204	650	1.204	858.333	1.204	675
	1.208	616.667	1.208	925	1.208	708.333
	1.212	658.333	1.212	941.667	1.212	625
	1.216	533.333	1.216	1000	1.216	666.667
	1.22	500	1.22	800	1.22	608.333
	1.224	516.667	1.224	925	1.224	700
	1.228	525	1.228	800	1.228	608.333
	1.232	500	1.232	858.333	1.232	691.667
	1.236	525	1.236	808.333	1.236	716.667
	1.24	483.333	1.24	725	1.24	600
	1.244	516.667	1.244	841.667	1.244	608.333
	1.248	466.667	1.248	791.667	1.248	658.333
	1.252	500	1.252	708.333	1.252	566.667
	1.256	416.667	1.256	808.333	1.256	575
	1.26	433.333	1.26	808.333	1.26	575
	1.264	350	1.264	758.333	1.264	700
	1.268	533.333	1.268	708.333	1.268	683.333
	1.272	558.333	1.272	516.667	1.272	450
	1.276	391.667	1.276	733.333	1.276	633.333
	1.28	350	1.28	650	1.28	708.333
	1.284	433.333	1.284	658.333	1.284	625
	1.288	491.667	1.288	683.333	1.288	608.333
	1.292	483.333	1.292	650	1.292	600
	1.296	358.333	1.296	666.667	1.296	591.667
	1.3	458.333	1.3	691.667	1.3	558.333
	1.304	408.333	1.304	625	1.304	583.333
	1.308	433.333	1.308	641.667	1.308	583.333
	1.312	475	1.312	608.333	1.312	583.333
	1.316	500	1.316	591.667	1.316	591.667
	1.32	450	1.32	633.333	1.32	608.333
	1.324	383.333	1.324	525	1.324	591.667
	1.328	341.667	1.328	650	1.328	625
	1.332	391.667	1.332	591.667	1.332	541.667
	1.336	383.333	1.336	591.667	1.336	575
	1.34	366.667	1.34	650	1.34	641.667
	1.344	375	1.344	641.667	1.344	591.667
	1.348	341.667	1.348	566.667	1.348	541.667
	1.352	325	1.352	566.667	1.352	575
	1.356	366.667	1.356	608.333	1.356	658.333
	1.36	341.667	1.36	550	1.36	558.333
	1.364	458.333	1.364	558.333	1.364	658.333
	1.368	416.667	1.368	483.333	1.368	700
	1.372	375	1.372	483.333	1.372	566.667
	1.376	358.333	1.376	575	1.376	525
	1.38	408.333	1.38	500	1.38	600
	1.384	333.333	1.384	491.667	1.384	500
	1.388	375	1.388	575	1.388	566.667
	1.392	341.667	1.392	525	1.392	533.333
	1.396	375	1.396	400	1.396	666.667
	1.4	333.333	1.4	541.667	1.4	566.667
	1.404	316.667	1.404	508.333	1.404	508.333
	1.408	233.333	1.408	425	1.408	541.667
	1.412	291.667	1.412	550	1.412	575
	1.416	250	1.416	516.667	1.416	558.333
	1.42	233.333	1.42	458.333	1.42	533.333
	1.424	325	1.424	516.667	1.424	575
	1.428	366.667	1.428	441.667	1.428	583.333
	1.432	391.667	1.432	441.667	1.432	525
	1.436	358.333	1.436	500	1.436	575
	1.44	333.333	1.44	433.333	1.44	541.667
	1.444	333.333	1.444	450	1.444	608.333
	1.448	325	1.448	475	1.448	566.667
	1.452	250	1.452	416.667	1.452	525
	1.456	316.667	1.456	533.333	1.456	516.667
	1.46	308.333	1.46	416.667	1.46	475
	1.464	250	1.464	475	1.464	525
	1.468	275	1.468	441.667	1.468	525
	1.472	308.333	1.472	466.667	1.472	525
	1.476	283.333	1.476	433.333	1.476	516.667
	1.48	300	1.48	425	1.48	516.667
	1.484	316.667	1.484	341.667	1.484	566.667
	1.488	225	1.488	375	1.488	475
	1.492	291.667	1.492	400	1.492	550
	1.496	308.333	1.496	441.667	1.496	591.667
	1.5	283.333	1.5	375	1.5	566.667
	1.504	308.333	1.504	400	1.504	533.333
	1.508	233.333	1.508	408.333	1.508	608.333
	1.512	283.333	1.512	466.667	1.512	525
	1.516	233.333	1.516	450	1.516	441.667
	1.52	225	1.52	408.333	1.52	491.667
	1.524	333.333	1.524	416.667	1.524	550
	1.528	358.333	1.528	375	1.528	566.667
	1.532	300	1.532	400	1.532	541.667
	1.536	216.667	1.536	416.667	1.536	533.333
	1.54	308.333	1.54	358.333	1.54	466.667
	1.544	241.667	1.544	383.333	1.544	450
	1.548	325	1.548	416.667	1.548	525
	1.552	216.667	1.552	425	1.552	516.667
	1.556	200	1.556	375	1.556	558.333
	1.56	241.667	1.56	358.333	1.56	525
	1.564	275	1.564	375	1.564	441.667
	1.568	300	1.568	366.667	1.568	441.667
	1.572	266.667	1.572	350	1.572	550
	1.576	250	1.576	316.667	1.576	508.333
	1.58	250	1.58	350	1.58	541.667
	1.584	308.333	1.584	391.667	1.584	508.333
	1.588	225	1.588	366.667	1.588	516.667
	1.592	175	1.592	341.667	1.592	533.333
	1.596	233.333	1.596	400	1.596	500
	1.6	325	1.6	408.333	1.6	541.667
	1.604	233.333	1.604	308.333	1.604	508.333
	1.608	300	1.608	316.667	1.608	491.667
	1.612	191.667	1.612	341.667	1.612	541.667
	1.616	191.667	1.616	341.667	1.616	500
	1.62	216.667	1.62	341.667	1.62	475
	1.624	258.333	1.624	308.333	1.624	516.667
	1.628	233.333	1.628	383.333	1.628	525
	1.632	258.333	1.632	275	1.632	458.333
	1.636	241.667	1.636	341.667	1.636	483.333
	1.64	191.667	1.64	333.333	1.64	491.667
	1.644	183.333	1.644	341.667	1.644	475
	1.648	175	1.648	316.667	1.648	416.667
	1.652	275	1.652	391.667	1.652	491.667
	1.656	250	1.656	350	1.656	491.667
	1.66	150	1.66	291.667	1.66	525
	1.664	225	1.664	391.667	1.664	466.667
	1.668	241.667	1.668	358.333	1.668	466.667
	1.672	225	1.672	300	1.672	475
	1.676	208.333	1.676	358.333	1.676	516.667
	1.68	283.333	1.68	391.667	1.68	516.667
	1.684	216.667	1.684	300	1.684	508.333
	1.688	175	1.688	308.333	1.688	483.333
	1.692	266.667	1.692	408.333	1.692	500
	1.696	175	1.696	283.333	1.696	541.667
	1.7	183.333	1.7	316.667	1.7	500
	1.704	250	1.704	291.667	1.704	525
	1.708	166.667	1.708	391.667	1.708	458.333
	1.712	200	1.712	325	1.712	400
	1.716	183.333	1.716	375	1.716	508.333
	1.72	166.667	1.72	358.333	1.72	508.333
	1.724	183.333	1.724	316.667	1.724	383.333
	1.728	183.333	1.728	291.667	1.728	558.333
	1.732	225	1.732	350	1.732	525
	1.736	266.667	1.736	333.333	1.736	525
	1.74	216.667	1.74	341.667	1.74	450
	1.744	250	1.744	316.667	1.744	441.667
	1.748	166.667	1.748	300	1.748	608.333
	1.752	191.667	1.752	325	1.752	425
	1.756	183.333	1.756	375	1.756	491.667
	1.76	225	1.76	291.667	1.76	525
	1.764	225	1.764	325	1.764	441.667
	1.768	191.667	1.768	316.667	1.768	508.333
	1.772	250	1.772	275	1.772	441.667
	1.776	116.667	1.776	333.333	1.776	508.333
	1.78	150	1.78	333.333	1.78	466.667
	1.784	166.667	1.784	325	1.784	416.667
	1.788	166.667	1.788	283.333	1.788	516.667
	1.792	200	1.792	266.667	1.792	416.667
	1.796	208.333	1.796	333.333	1.796	508.333
	1.8	225	1.8	340	1.8	483.333
	1.804	108.333	1.804	323.333	1.804	516.667
	1.808	258.333	1.808	356.667	1.808	441.667
	1.812	225	1.812	340	1.812	475
	1.816	100	1.816	290	1.816	483.333
	1.82	275	1.82	248.333	1.82	500
	1.824	166.667	1.824	331.667	1.824	441.667
	1.828	158.333	1.828	340	1.828	450
	1.832	158.333	1.832	290	1.832	508.333
	1.836	258.333	1.836	290	1.836	483.333
	1.84	200	1.84	273.333	1.84	475
	1.844	191.667	1.844	323.333	1.844	458.333
	1.848	225	1.848	273.333	1.848	466.667
	1.852	191.667	1.852	315	1.852	466.667
	1.856	150	1.856	273.333	1.856	425
	1.86	191.667	1.86	306.667	1.86	525
	1.864	266.667	1.864	323.333	1.864	400
	1.868	175	1.868	331.667	1.868	400
	1.872	200	1.872	348.333	1.872	450
	1.876	191.667	1.876	290	1.876	458.333
	1.88	200	1.88	281.667	1.88	533.333
	1.884	183.333	1.884	290	1.884	450
	1.888	200	1.888	265	1.888	466.667
	1.892	175	1.892	298.333	1.892	491.667
	1.896	83.3333	1.896	315	1.896	466.667
	1.9	175	1.9	298.333	1.9	491.667
	1.904	83.3333	1.904	298.333	1.904	441.667
	1.908	166.667	1.908	265	1.908	475
	1.912	233.333	1.912	340	1.912	425
	1.916	166.667	1.916	273.333	1.916	508.333
	1.92	166.667	1.92	290	1.92	500
	1.924	183.333	1.924	240	1.924	458.333
	1.928	125	1.928	273.333	1.928	391.667
	1.932	91.6667	1.932	281.667	1.932	433.333
	1.936	200	1.936	323.333	1.936	466.667
	1.94	191.667	1.94	265	1.94	508.333
	1.944	208.333	1.944	281.667	1.944	466.667
	1.948	183.333	1.948	331.667	1.948	416.667
	1.952	141.667	1.952	356.667	1.952	508.333
	1.956	166.667	1.956	373.333	1.956	475
	1.96	150	1.96	315	1.96	441.667
	1.964	116.667	1.964	281.667	1.964	416.667
	1.968	208.333	1.968	291.667	1.968	466.667
	1.972	133.333	1.972	285	1.972	441.667
	1.976	133.333	1.976	281.667	1.976	525
	1.98	183.333	1.98	298.333	1.98	466.667
	1.984	116.667	1.984	306.667	1.984	458.333
	1.988	183.333	1.988	281.667	1.988	500
	1.992	225	1.992	306.667	1.992	458.333
	1.996	200	1.996	323.333	1.996	425
	2	216.667	2	345	2	523.333
	2.004	158.333	2.004	313	2.004	506.667
	2.008	158.333	2.008	278.333	2.008	523.333
	2.012	191.667	2.012	311.667	2.012	465
	2.016	191.667	2.016	343	2.016	415
	2.02	216.667	2.02	326.667	2.02	506.667
	2.024	133.333	2.024	333	2.024	498.333
	2.028	166.667	2.028	376.667	2.028	515
	2.032	208.333	2.032	385.333	2.032	481.667
	2.036	158.333	2.036	308.333	2.036	481.667
	2.04	175	2.04	325	2.04	490
	2.044	141.667	2.044	321.667	2.044	473.333
	2.048	208.333	2.048	358.333	2.048	523.333
	2.052	133.333	2.052	283.333	2.052	465
	2.056	216.667	2.056	366.667	2.056	515
	2.06	91.6667	2.06	341.667	2.06	523.333
	2.064	108.333	2.064	358.333	2.064	490
	2.068	191.667	2.068	341.667	2.068	473.333
	2.072	208.333	2.072	358.333	2.072	506.667
	2.076	175	2.076	325	2.076	540
	2.08	116.667	2.08	366.667	2.08	548.333
	2.084	75	2.084	325	2.084	498.333
	2.088	183.333	2.088	333.333	2.088	523.333
	2.092	166.667	2.092	316.667	2.092	548.333
	2.096	133.333	2.096	283.333	2.096	531.667
	2.1	116.667	2.1	266.667	2.1	473.333
	2.104	175	2.104	325	2.104	573.333
	2.108	133.333	2.108	283.333	2.108	548.333
	2.112	183.333	2.112	333.333	2.112	506.667
	2.116	225	2.116	375	2.116	498.333
	2.12	191.667	2.12	341.667	2.12	531.667
	2.124	141.667	2.124	291.667	2.124	415
	2.128	216.667	2.128	366.667	2.128	456.667
	2.132	150	2.132	300	2.132	498.333
	2.136	125	2.136	375	2.136	498.333
	2.14	166.667	2.14	316.667	2.14	498.333
	2.144	225	2.144	375	2.144	548.333
	2.148	233.333	2.148	383.333	2.148	498.333
	2.152	208.333	2.152	358.333	2.152	515
	2.156	208.333	2.156	358.333	2.156	490
	2.16	158.333	2.16	308.333	2.16	481.667
	2.164	108.333	2.164	258.333	2.164	490
	2.168	116.667	2.168	266.667	2.168	473.333
	2.172	241.667	2.172	391.667	2.172	506.667
	2.176	200	2.176	350	2.176	481.667
	2.18	191.667	2.18	341.667	2.18	573.333
	2.184	183.333	2.184	333.333	2.184	498.333
	2.188	200	2.188	350	2.188	465
	2.192	141.667	2.192	291.667	2.192	531.667
	2.196	133.333	2.196	283.333	2.196	515
	2.2	200	2.2	350	2.2	506.667
	2.204	133.333	2.204	283.333	2.204	473.333
	2.208	225	2.208	375	2.208	440
	2.212	116.667	2.212	266.667	2.212	548.333
	2.216	150	2.216	300	2.216	506.667
	2.22	183.333	2.22	333.333	2.22	523.333
	2.224	241.667	2.224	391.667	2.224	465
	2.228	250	2.228	400	2.228	456.667
	2.232	133.333	2.232	283.333	2.232	506.667
	2.236	200	2.236	350	2.236	540
	2.24	183.333	2.24	383.333	2.24	506.667
	2.244	183.333	2.244	333.333	2.244	515
	2.248	125	2.248	275	2.248	481.667
	2.252	233.333	2.252	303.333	2.252	473.333
	2.256	108.333	2.256	258.333	2.256	490
	2.26	225	2.26	375	2.26	498.333
	2.264	158.333	2.264	308.333	2.264	481.667
	2.268	166.667	2.268	316.667	2.268	473.333
	2.272	216.667	2.272	366.667	2.272	465
	2.276	191.667	2.276	341.667	2.276	473.333
	2.28	116.667	2.28	266.667	2.28	490
	2.284	183.333	2.284	333.333	2.284	540
	2.288	225	2.288	375	2.288	490
	2.292	233.333	2.292	383.333	2.292	565
	2.296	158.333	2.296	308.333	2.296	440
	2.3	266.667	2.3	416.667	2.3	490
	2.304	216.667	2.304	366.667	2.304	523.333
	2.308	133.333	2.308	283.333	2.308	506.667
	2.312	125	2.312	275	2.312	506.667
	2.316	150	2.316	300	2.316	473.333
	2.32	141.667	2.32	291.667	2.32	515
	2.324	183.333	2.324	333.333	2.324	506.667
	2.328	166.667	2.328	316.667	2.328	415
	2.332	175	2.332	325	2.332	473.333
	2.336	250	2.336	400	2.336	490
	2.34	191.667	2.34	341.667	2.34	523.333
	2.344	150	2.344	300	2.344	498.333
	2.348	141.667	2.348	291.667	2.348	498.333
	2.352	166.667	2.352	316.667	2.352	490
	2.356	175	2.356	325	2.356	506.667
	2.36	166.667	2.36	316.667	2.36	515
	2.364	208.333	2.364	358.333	2.364	481.667
	2.368	208.333	2.368	358.333	2.368	540
	2.372	225	2.372	375	2.372	523.333
	2.376	208.333	2.376	358.333	2.376	540
	2.38	200	2.38	350	2.38	556.667
	2.384	141.667	2.384	291.667	2.384	523.333
	2.388	175	2.388	325	2.388	540
	2.392	208.333	2.392	358.333	2.392	498.333
	2.396	91.6667	2.396	241.667	2.396	465
	2.4	225	2.4	375	2.4	465
	2.404	141.667	2.404	291.667	2.404	490
	2.408	225	2.408	375	2.408	523.333
	2.412	258.333	2.412	408.333	2.412	556.667
	2.416	200	2.416	350	2.416	523.333
	2.42	158.333	2.42	308.333	2.42	531.667
	2.424	125	2.424	275	2.424	565
	2.428	216.667	2.428	366.667	2.428	506.667
	2.432	225	2.432	375	2.432	540
	2.436	225	2.436	375	2.436	448.333
	2.44	200	2.44	350	2.44	456.667
	2.444	183.333	2.444	333.333	2.444	531.667
	2.448	175	2.448	325	2.448	515
	2.452	141.667	2.452	291.667	2.452	498.333
	2.456	225	2.456	375	2.456	490
	2.46	183.333	2.46	333.333	2.46	506.667
	2.464	166.667	2.464	316.667	2.464	481.667
	2.468	175	2.468	325	2.468	565
	2.472	166.667	2.472	316.667	2.472	531.667
	2.476	141.667	2.476	291.667	2.476	573.333
	2.48	191.667	2.48	341.667	2.48	556.667
	2.484	241.667	2.484	391.667	2.484	523.333
	2.488	250	2.488	400	2.488	490
	2.492	225	2.492	375	2.492	465
	2.496	191.667	2.496	341.667	2.496	481.667
	2.5	183.333	2.5	333.333	2.5	498.333
	2.504	158.333	2.504	308.333	2.504	465
	2.508	141.667	2.508	291.667	2.508	515
	2.512	183.333	2.512	333.333	2.512	498.333
	2.516	233.333	2.516	383.333	2.516	465
	2.52	175	2.52	325	2.52	556.667
	2.524	150	2.524	300	2.524	498.333
	2.528	166.667	2.528	316.667	2.528	490
	2.532	183.333	2.532	333.333	2.532	498.333
	2.536	225	2.536	375	2.536	548.333
	2.54	200	2.54	350	2.54	540
	2.544	175	2.544	325	2.544	540
	2.548	108.333	2.548	258.333	2.548	473.333
	2.552	233.333	2.552	383.333	2.552	481.667
	2.556	175	2.556	325	2.556	498.333
	2.56	216.667	2.56	366.667	2.56	548.333
	2.564	125	2.564	275	2.564	473.333
	2.568	308.333	2.568	458.333	2.568	448.333
	2.572	175	2.572	325	2.572	523.333
	2.576	241.667	2.576	391.667	2.576	490
	2.58	133.333	2.58	283.333	2.58	481.667
	2.584	158.333	2.584	308.333	2.584	523.333
	2.588	150	2.588	300	2.588	490
	2.592	150	2.592	300	2.592	490
	2.596	233.333	2.596	383.333	2.596	473.333
	2.6	166.667	2.6	316.667	2.6	490
	2.604	233.333	2.604	383.333	2.604	481.667
	2.608	175	2.608	325	2.608	515
	2.612	233.333	2.612	383.333	2.612	473.333
	2.616	125	2.616	275	2.616	540
	2.62	233.333	2.62	383.333	2.62	506.667
	2.624	191.667	2.624	341.667	2.624	531.667
	2.628	266.667	2.628	316.667	2.628	540
	2.632	233.333	2.632	383.333	2.632	498.333
	2.636	216.667	2.636	366.667	2.636	481.667
	2.64	133.333	2.64	283.333	2.64	490
	2.644	175	2.644	325	2.644	548.333
	2.648	141.667	2.648	291.667	2.648	431.667
	2.652	208.333	2.652	358.333	2.652	498.333
	2.656	225	2.656	375	2.656	523.333
	2.66	150	2.66	300	2.66	565
	2.664	233.333	2.664	383.333	2.664	523.333
	2.668	150	2.668	308.333	2.668	523.333
	2.672	158.333	2.672	300	2.672	490
	2.676	175	2.676	325	2.676	573.333
	2.68	191.667	2.68	341.667	2.68	515
	2.684	183.333	2.684	333.333	2.684	473.333
	2.688	133.333	2.688	283.333	2.688	490
	2.692	233.333	2.692	383.333	2.692	531.667
	2.696	208.333	2.696	358.333	2.696	456.667
	2.7	116.667	2.7	266.667	2.7	523.333
	2.704	183.333	2.704	333.333	2.704	540
	2.708	141.667	2.708	291.667	2.708	523.333
	2.712	250	2.712	400	2.712	490
	2.716	125	2.716	315	2.716	498.333
	2.72	225	2.72	375	2.72	531.667
	2.724	166.667	2.724	316.667	2.724	448.333
	2.728	166.667	2.728	316.667	2.728	515
	2.732	158.333	2.732	308.333	2.732	515
	2.736	150	2.736	300	2.736	506.667
	2.74	233.333	2.74	383.333	2.74	465
	2.744	275	2.744	425	2.744	481.667
	2.748	191.667	2.748	341.667	2.748	515
	2.752	158.333	2.752	308.333	2.752	448.333
	2.756	133.333	2.756	283.333	2.756	465
	2.76	141.667	2.76	291.667	2.76	515
	2.764	225	2.764	375	2.764	490
	2.768	158.333	2.768	308.333	2.768	440
	2.772	175	2.772	325	2.772	523.333
	2.776	258.333	2.776	408.333	2.776	515
	2.78	141.667	2.78	291.667	2.78	448.333
	2.784	133.333	2.784	283.333	2.784	481.667
	2.788	191.667	2.788	341.667	2.788	490
	2.792	175	2.792	325	2.792	523.333
	2.796	125	2.796	275	2.796	515
	2.8	233.333	2.8	383.333	2.8	515
	2.804	191.667	2.804	341.667	2.804	473.333
	2.808	241.667	2.808	391.667	2.808	473.333
	2.812	291.667	2.812	241.667	2.812	465
	2.816	191.667	2.816	341.667	2.816	448.333
	2.82	133.333	2.82	283.333	2.82	506.667
	2.824	166.667	2.824	316.667	2.824	573.333
	2.828	150	2.828	323	2.828	548.333
	2.832	158.333	2.832	308.333	2.832	498.333
	2.836	233.333	2.836	383.333	2.836	481.667
	2.84	133.333	2.84	283.333	2.84	473.333
	2.844	241.667	2.844	391.667	2.844	481.667
	2.848	116.667	2.848	266.667	2.848	481.667
	2.852	141.667	2.852	291.667	2.852	548.333
	2.856	158.333	2.856	308.333	2.856	548.333
	2.86	191.667	2.86	341.667	2.86	465
	2.864	216.667	2.864	366.667	2.864	490
	2.868	191.667	2.868	341.667	2.868	556.667
	2.872	200	2.872	350	2.872	523.333
	2.876	166.667	2.876	316.667	2.876	481.667
	2.88	150	2.88	300	2.88	448.333
	2.884	258.333	2.884	408.333	2.884	548.333
	2.888	216.667	2.888	366.667	2.888	531.667
	2.892	200	2.892	325.333	2.892	523.333
	2.896	200	2.896	350	2.896	490
	2.9	225	2.9	371.667	2.9	473.333
	2.904	133.333	2.904	283.333	2.904	490
	2.908	158.333	2.908	308.333	2.908	515
	2.912	141.667	2.912	291.667	2.912	515
	2.916	200	2.916	335	2.916	490
	2.92	200	2.92	351	2.92	465
	2.924	150	2.924	300	2.924	531.667
	2.928	241.667	2.928	391.667	2.928	465
	2.932	166.667	2.932	316.667	2.932	565
	2.936	158.333	2.936	308.333	2.936	506.667
	2.94	191.667	2.94	341.667	2.94	556.667
	2.944	175	2.944	325	2.944	581.667
	2.948	216.667	2.948	366.667	2.948	556.667
	2.952	166.667	2.952	316.667	2.952	481.667
	2.956	191.667	2.956	341.667	2.956	490
	2.96	108.333	2.96	258.333	2.96	540
	2.964	116.667	2.964	266.667	2.964	556.667
	2.968	216.667	2.968	366.667	2.968	448.333
	2.972	125	2.972	275	2.972	523.333
	2.976	158.333	2.976	308.333	2.976	490
	2.98	208.333	2.98	358.333	2.98	456.667
	2.984	216.667	2.984	366.667	2.984	490
	2.988	258.333	2.988	408.333	2.988	515
	2.992	166.667	2.992	316.667	2.992	465
	2.996	250	2.996	411	2.996	490
	3	133.333	3	283.333	3	510
	3.004	183.333	3.004	333.333	3.004	503.333
	3.008	208.333	3.008	358.333	3.008	470
	3.012	158.333	3.012	308.333	3.012	503.333
	3.016	133.333	3.016	283.333	3.016	445
	3.02	150	3.02	300	3.02	436.667
	3.024	225	3.024	375	3.024	420
	3.028	141.667	3.028	291.667	3.028	470
	3.032	250	3.032	400	3.032	486.667
	3.036	191.667	3.036	341.667	3.036	486.667
	3.04	175	3.04	325	3.04	428.333
	3.044	158.333	3.044	308.333	3.044	470
	3.048	208.333	3.048	358.333	3.048	520
	3.052	225	3.052	375	3.052	445
	3.056	200	3.056	350	3.056	453.333
	3.06	183.333	3.06	333.333	3.06	436.667
	3.064	241.667	3.064	391.667	3.064	445
	3.068	191.667	3.068	341.667	3.068	445
	3.072	141.667	3.072	291.667	3.072	520
	3.076	166.667	3.076	316.667	3.076	486.667
	3.08	216.667	3.08	366.667	3.08	403.333
	3.084	233.333	3.084	383.333	3.084	428.333
	3.088	166.667	3.088	316.667	3.088	453.333
	3.092	141.667	3.092	291.667	3.092	453.333
	3.096	200	3.096	350	3.096	553.333
	3.1	233.333	3.1	383.333	3.1	436.667
	3.104	225	3.104	375	3.104	511.667
	3.108	175	3.108	325	3.108	495
	3.112	241.667	3.112	391.667	3.112	453.333
	3.116	191.667	3.116	341.667	3.116	470
	3.12	233.333	3.12	383.333	3.12	461.667
	3.124	191.667	3.124	341.667	3.124	486.667
	3.128	200	3.128	350	3.128	486.667
	3.132	150	3.132	300	3.132	486.667
	3.136	216.667	3.136	366.667	3.136	428.333
	3.14	125	3.14	275	3.14	561.667
	3.144	166.667	3.144	316.667	3.144	461.667
	3.148	175	3.148	325	3.148	478.333
	3.152	175	3.152	325	3.152	428.333
	3.156	175	3.156	325	3.156	520
	3.16	200	3.16	350	3.16	436.667
	3.164	133.333	3.164	283.333	3.164	470
	3.168	208.333	3.168	358.333	3.168	503.333
	3.172	191.667	3.172	341.667	3.172	445
	3.176	158.333	3.176	308.333	3.176	495
	3.18	141.667	3.18	291.667	3.18	486.667
	3.184	266.667	3.184	416.667	3.184	495
	3.188	175	3.188	325	3.188	495
	3.192	141.667	3.192	291.667	3.192	478.333
	3.196	91.6667	3.196	241.667	3.196	486.667
	3.2	216.667	3.2	366.667	3.2	470
	3.204	91.6667	3.204	241.667	3.204	470
	3.208	158.333	3.208	308.333	3.208	486.667
	3.212	141.667	3.212	291.667	3.212	403.333
	3.216	175	3.216	325	3.216	486.667
	3.22	166.667	3.22	316.667	3.22	453.333
	3.224	125	3.224	275	3.224	495
	3.228	166.667	3.228	316.667	3.228	486.667
	3.232	208.333	3.232	358.333	3.232	461.667
	3.236	233.333	3.236	383.333	3.236	520
	3.24	75	3.24	225	3.24	478.333
	3.244	150	3.244	300	3.244	478.333
	3.248	200	3.248	350	3.248	453.333
	3.252	150	3.252	300	3.252	453.333
	3.256	158.333	3.256	308.333	3.256	511.667
	3.26	75	3.26	325	3.26	478.333
	3.264	83.3333	3.264	333.333	3.264	445
	3.268	216.667	3.268	366.667	3.268	428.333
	3.272	208.333	3.272	358.333	3.272	503.333
	3.276	141.667	3.276	291.667	3.276	470
	3.28	200	3.28	350	3.28	486.667
	3.284	150	3.284	300	3.284	445
	3.288	166.667	3.288	316.667	3.288	511.667
	3.292	116.667	3.292	266.667	3.292	436.667
	3.296	166.667	3.296	316.667	3.296	461.667
	3.3	166.667	3.3	316.667	3.3	470
	3.304	166.667	3.304	316.667	3.304	478.333
	3.308	166.667	3.308	316.667	3.308	553.333
	3.312	133.333	3.312	283.333	3.312	436.667
	3.316	158.333	3.316	308.333	3.316	461.667
	3.32	200	3.32	350	3.32	461.667
	3.324	150	3.324	300	3.324	411.667
	3.328	175	3.328	325	3.328	470
	3.332	200	3.332	350	3.332	486.667
	3.336	150	3.336	300	3.336	411.667
	3.34	183.333	3.34	333.333	3.34	453.333
	3.344	166.667	3.344	316.667	3.344	470
	3.348	141.667	3.348	291.667	3.348	445
	3.352	166.667	3.352	316.667	3.352	445
	3.356	150	3.356	300	3.356	470
	3.36	150	3.36	300	3.36	436.667
	3.364	183.333	3.364	333.333	3.364	470
	3.368	108.333	3.368	258.333	3.368	478.333
	3.372	183.333	3.372	333.333	3.372	470
	3.376	116.667	3.376	266.667	3.376	495
	3.38	208.333	3.38	358.333	3.38	420
	3.384	200	3.384	350	3.384	478.333
	3.388	141.667	3.388	291.667	3.388	495
	3.392	191.667	3.392	341.667	3.392	528.333
	3.396	133.333	3.396	283.333	3.396	411.667
	3.4	183.333	3.4	333.333	3.4	470
	3.404	200	3.404	350	3.404	445
	3.408	158.333	3.408	308.333	3.408	436.667
	3.412	100	3.412	250	3.412	495
	3.416	150	3.416	300	3.416	420
	3.42	150	3.42	300	3.42	511.667
	3.424	133.333	3.424	283.333	3.424	428.333
	3.428	166.667	3.428	316.667	3.428	520
	3.432	133.333	3.432	283.333	3.432	453.333
	3.436	141.667	3.436	291.667	3.436	436.667
	3.44	175	3.44	325	3.44	461.667
	3.444	216.667	3.444	366.667	3.444	486.667
	3.448	208.333	3.448	358.333	3.448	436.667
	3.452	158.333	3.452	308.333	3.452	461.667
	3.456	141.667	3.456	291.667	3.456	420
	3.46	141.667	3.46	291.667	3.46	461.667
	3.464	133.333	3.464	283.333	3.464	395
	3.468	116.667	3.468	266.667	3.468	453.333
	3.472	133.333	3.472	283.333	3.472	420
	3.476	150	3.476	300	3.476	445
	3.48	150	3.48	300	3.48	411.667
	3.484	133.333	3.484	283.333	3.484	470
	3.488	125	3.488	275	3.488	436.667
	3.492	166.667	3.492	316.667	3.492	420
	3.496	183.333	3.496	333.333	3.496	470
	3.5	175	3.5	325	3.5	448.333
	3.504	125	3.504	275	3.504	420
	3.508	166.667	3.508	316.667	3.508	420
	3.512	225	3.512	375	3.512	436.667
	3.516	133.333	3.516	283.333	3.516	445
	3.52	158.333	3.52	308.333	3.52	411.667
	3.524	150	3.524	300	3.524	411.667
	3.528	175	3.528	325	3.528	495
	3.532	116.667	3.532	266.667	3.532	445
	3.536	66.6667	3.536	216.333	3.536	420
	3.54	125	3.54	275	3.54	395
	3.544	150	3.544	324.333	3.544	411.667
	3.548	116.667	3.548	266.667	3.548	470
	3.552	141.667	3.552	291.667	3.552	461.667
	3.556	166.667	3.556	316.667	3.556	436.667
	3.56	216.667	3.56	366.667	3.56	420
	3.564	133.333	3.564	283.333	3.564	470
	3.568	141.667	3.568	291.667	3.568	403.333
	3.572	208.333	3.572	358.333	3.572	370
	3.576	158.333	3.576	308.333	3.576	420
	3.58	158.333	3.58	308.333	3.58	420
	3.584	150	3.584	300	3.584	436.667
	3.588	191.667	3.588	341.667	3.588	411.667
	3.592	91.6667	3.592	241.667	3.592	420
	3.596	116.667	3.596	266.667	3.596	428.333
	3.6	175	3.6	325	3.6	420
	3.604	191.667	3.604	341.667	3.604	453.333
	3.608	100	3.608	250	3.608	395
	3.612	116.667	3.612	266.667	3.612	461.667
	3.616	166.667	3.616	316.667	3.616	411.667
	3.62	183.333	3.62	333.333	3.62	378.333
	3.624	183.333	3.624	333.333	3.624	445
	3.628	133.333	3.628	283.333	3.628	470
	3.632	183.333	3.632	333.333	3.632	470
	3.636	91.6667	3.636	241.667	3.636	445
	3.64	125	3.64	275	3.64	395
	3.644	158.333	3.644	308.333	3.644	420
	3.648	133.333	3.648	283.333	3.648	403.333
	3.652	33.3333	3.652	183.333	3.652	461.667
	3.656	150	3.656	300	3.656	420
	3.66	183.333	3.66	333.333	3.66	428.333
	3.664	150	3.664	300	3.664	445
	3.668	150	3.668	300	3.668	445
	3.672	116.667	3.672	266.667	3.672	428.333
	3.676	183.333	3.676	333.333	3.676	378.333
	3.68	166.667	3.68	316.667	3.68	486.667
	3.684	158.333	3.684	308.333	3.684	403.333
	3.688	158.333	3.688	308.333	3.688	395
	3.692	133.333	3.692	283.333	3.692	478.333
	3.696	125	3.696	275	3.696	361.667
	3.7	166.667	3.7	316.667	3.7	428.333
	3.704	100	3.704	250	3.704	408.333
	3.708	150	3.708	300	3.708	450
	3.712	150	3.712	300	3.712	466.667
	3.716	108.333	3.716	258.333	3.716	391.667
	3.72	166.667	3.72	316.667	3.72	450
	3.724	91.6667	3.724	241.667	3.724	366.667
	3.728	125	3.728	275	3.728	425
	3.732	150	3.732	300	3.732	408.333
	3.736	158.333	3.736	308.333	3.736	383.333
	3.74	200	3.74	350	3.74	383.333
	3.744	100	3.744	250	3.744	408.333
	3.748	116.667	3.748	266.667	3.748	408.333
	3.752	108.333	3.752	258.333	3.752	408.333
	3.756	166.667	3.756	316.667	3.756	458.333
	3.76	191.667	3.76	341.667	3.76	408.333
	3.764	141.667	3.764	291.667	3.764	416.667
	3.768	133.333	3.768	283.333	3.768	450
	3.772	166.667	3.772	316.667	3.772	391.667
	3.776	108.333	3.776	258.333	3.776	458.333
	3.78	41.6667	3.78	191.667	3.78	466.667
	3.784	91.6667	3.784	241.667	3.784	391.667
	3.788	133.333	3.788	283.333	3.788	458.333
	3.792	58.3333	3.792	204	3.792	375
	3.796	125	3.796	275.333	3.796	425
	3.8	100	3.8	215	3.8	400
	3.804	175	3.804	325	3.804	383.333
	3.808	83.3333	3.808	233.333	3.808	441.667
	3.812	133.333	3.812	283.333	3.812	450
	3.816	183.333	3.816	333.333	3.816	358.333
	3.82	183.333	3.82	333.333	3.82	441.667
	3.824	100	3.824	256	3.824	383.333
	3.828	91.6667	3.828	241.667	3.828	466.667
	3.832	125	3.832	275.667	3.832	350
	3.836	100	3.836	225	3.836	416.667
	3.84	158.333	3.84	308.333	3.84	425
	3.844	108.333	3.844	258.333	3.844	450
	3.848	166.667	3.848	316.667	3.848	383.333
	3.852	108.333	3.852	258.333	3.852	400
	3.856	141.667	3.856	291.667	3.856	400
	3.86	108.333	3.86	258.333	3.86	358.333
	3.864	141.667	3.864	291.667	3.864	375
	3.868	141.667	3.868	291.667	3.868	450
	3.872	141.667	3.872	291.667	3.872	366.667
	3.876	150	3.876	300	3.876	400
	3.88	75	3.88	225	3.88	408.333
	3.884	183.333	3.884	333.333	3.884	433.333
	3.888	116.667	3.888	266.667	3.888	366.667
	3.892	58.3333	3.892	208.333	3.892	475
	3.896	125	3.896	275	3.896	325
	3.9	116.667	3.9	266.667	3.9	350
	3.904	91.6667	3.904	241.667	3.904	458.333
	3.908	141.667	3.908	291.667	3.908	408.333
	3.912	125	3.912	275	3.912	458.333
	3.916	91.6667	3.916	241.667	3.916	425
	3.92	108.333	3.92	258.333	3.92	408.333
	3.924	116.667	3.924	266.667	3.924	416.667
	3.928	108.333	3.928	258.333	3.928	375
	3.932	191.667	3.932	341.667	3.932	375
	3.936	108.333	3.936	258.333	3.936	400
	3.94	100	3.94	250	3.94	450
	3.944	116.667	3.944	266.667	3.944	441.667
	3.948	83.3333	3.948	233.333	3.948	391.667
	3.952	116.667	3.952	266.667	3.952	400
	3.956	66.6667	3.956	216.667	3.956	391.667
	3.96	108.333	3.96	258.333	3.96	408.333
	3.964	108.333	3.964	258.333	3.964	350
	3.968	125	3.968	275	3.968	400
	3.972	58.3333	3.972	208.333	3.972	441.667
	3.976	83.3333	3.976	233.333	3.976	400
	3.98	166.667	3.98	316.667	3.98	408.333
	3.984	100	3.984	250	3.984	375
	3.988	150	3.988	300	3.988	333.333
	3.992	100	3.992	250	3.992	400
	3.996	91.6667	3.996	241.667	3.996	383.333
	4	166.667	4	258.333	4	433.333
	4.004	116.667	4.004	200	4.004	450
	4.008	100	4.008	208.333	4.008	416.667
	4.012	125	4.012	233.333	4.012	341.667
	4.016	125	4.016	258.333	4.016	408.333
	4.02	141.667	4.02	291.667	4.02	383.333
	4.024	100	4.024	191.667	4.024	358.333
	4.028	116.667	4.028	283.333	4.028	391.667
	4.032	66.6667	4.032	175	4.032	400
	4.036	100	4.036	283.333	4.036	450
	4.04	133.333	4.04	241.667	4.04	441.667
	4.044	133.333	4.044	216.667	4.044	408.333
	4.048	116.667	4.048	225	4.048	450
	4.052	125	4.052	208.333	4.052	366.667
	4.056	175	4.056	175	4.056	391.667
	4.06	125	4.06	241.667	4.06	408.333
	4.064	108.333	4.064	266.667	4.064	425
	4.068	91.6667	4.068	275	4.068	441.667
	4.072	91.6667	4.072	233.333	4.072	375
	4.076	116.667	4.076	208.333	4.076	441.667
	4.08	75	4.08	183.333	4.08	466.667
	4.084	91.6667	4.084	233.333	4.084	341.667
	4.088	141.667	4.088	233.333	4.088	483.333
	4.092	175	4.092	183.333	4.092	350
	4.096	133.333	4.096	233.333	4.096	391.667
	4.1	83.3333	4.1	300	4.1	366.667
	4.104	175	4.104	216.667	4.104	375
	4.108	125	4.108	266.667	4.108	383.333
	4.112	158.333	4.112	233.333	4.112	441.667
	4.116	58.3333	4.116	241.667	4.116	366.667
	4.12	150	4.12	183.333	4.12	408.333
	4.124	116.667	4.124	250	4.124	433.333
	4.128	125	4.128	275	4.128	375
	4.132	125	4.132	200	4.132	375
	4.136	91.6667	4.136	275	4.136	333.333
	4.14	75	4.14	275	4.14	441.667
	4.144	58.3333	4.144	241.667	4.144	416.667
	4.148	58.3333	4.148	233.333	4.148	383.333
	4.152	91.6667	4.152	258.333	4.152	391.667
	4.156	100	4.156	241.667	4.156	441.667
	4.16	108.333	4.16	225	4.16	391.667
	4.164	91.6667	4.164	216.667	4.164	375
	4.168	158.333	4.168	233.333	4.168	366.667
	4.172	100	4.172	191.667	4.172	408.333
	4.176	66.6667	4.176	208.333	4.176	408.333
	4.18	133.333	4.18	266.667	4.18	400
	4.184	75	4.184	208.333	4.184	425
	4.188	116.667	4.188	291.667	4.188	366.667
	4.192	75	4.192	233.333	4.192	350
	4.196	108.333	4.196	291.667	4.196	416.667
	4.2	75	4.2	250	4.2	425
	4.204	58.3333	4.204	225	4.204	433.333
	4.208	150	4.208	266.667	4.208	375
	4.212	125	4.212	283.333	4.212	383.333
	4.216	108.333	4.216	216.667	4.216	433.333
	4.22	91.6667	4.22	216.667	4.22	391.667
	4.224	58.3333	4.224	225	4.224	366.667
	4.228	100	4.228	233.333	4.228	400
	4.232	100	4.232	191.667	4.232	358.333
	4.236	108.333	4.236	166.667	4.236	425
	4.24	100	4.24	266.667	4.24	358.333
	4.244	108.333	4.244	233.333	4.244	450
	4.248	108.333	4.248	250	4.248	350
	4.252	125	4.252	275	4.252	341.667
	4.256	108.333	4.256	216.667	4.256	391.667
	4.26	91.6667	4.26	158.333	4.26	375
	4.264	83.3333	4.264	183.333	4.264	383.333
	4.268	108.333	4.268	208.333	4.268	383.333
	4.272	100	4.272	183.333	4.272	383.333
	4.276	166.667	4.276	258.333	4.276	358.333
	4.28	75	4.28	291.667	4.28	400
	4.284	91.6667	4.284	241.667	4.284	391.667
	4.288	83.3333	4.288	225	4.288	400
	4.292	58.3333	4.292	175	4.292	400
	4.296	133.333	4.296	275	4.296	400
	4.3	91.6667	4.3	266.667	4.3	366.667
	4.304	125	4.304	291.667	4.304	391.667
	4.308	108.333	4.308	233.333	4.308	408.333
	4.312	116.667	4.312	200	4.312	391.667
	4.316	91.6667	4.316	266.667	4.316	358.333
	4.32	141.667	4.32	250	4.32	416.667
	4.324	83.3333	4.324	183.333	4.324	366.667
	4.328	133.333	4.328	200	4.328	383.333
	4.332	108.333	4.332	216.667	4.332	391.667
	4.336	116.667	4.336	208.333	4.336	433.333
	4.34	58.3333	4.34	233.333	4.34	375
	4.344	175	4.344	250	4.344	366.667
	4.348	58.3333	4.348	233.333	4.348	383.333
	4.352	133.333	4.352	208.333	4.352	350
	4.356	125	4.356	166.667	4.356	341.667
	4.36	58.3333	4.36	208.333	4.36	391.667
	4.364	83.3333	4.364	216.667	4.364	408.333
	4.368	83.3333	4.368	216.667	4.368	375
	4.372	91.6667	4.372	258.333	4.372	383.333
	4.376	58.3333	4.376	250	4.376	400
	4.38	166.667	4.38	233.333	4.38	400
	4.384	116.667	4.384	216.667	4.384	383.333
	4.388	83.3333	4.388	133.333	4.388	366.667
	4.392	33.3333	4.392	175	4.392	358.333
	4.396	108.333	4.396	191.667	4.396	358.333
	4.4	66.6667	4.4	191.667	4.4	391.667
	4.404	83.3333	4.404	183.333	4.404	433.333
	4.408	100	4.408	233.333	4.408	375
	4.412	100	4.412	233.333	4.412	391.667
	4.416	75	4.416	191.667	4.416	433.333
	4.42	100	4.42	250	4.42	375
	4.424	116.667	4.424	216.667	4.424	391.667
	4.428	66.6667	4.428	266.667	4.428	391.667
	4.432	108.333	4.432	200	4.432	358.333
	4.436	100	4.436	175	4.436	450
	4.44	50	4.44	275	4.44	441.667
	4.444	116.667	4.444	216.667	4.444	400
	4.448	58.3333	4.448	258.333	4.448	408.333
	4.452	141.667	4.452	241.667	4.452	350
	4.456	75	4.456	241.667	4.456	400
	4.46	141.667	4.46	191.667	4.46	391.667
	4.464	91.6667	4.464	216.667	4.464	383.333
	4.468	83.3333	4.468	225	4.468	375
	4.472	141.667	4.472	200	4.472	350
	4.476	75	4.476	216.667	4.476	408.333
	4.48	83.3333	4.48	166.667	4.48	391.667
	4.484	83.3333	4.484	183.333	4.484	400
	4.488	91.6667	4.488	216.667	4.488	391.667
	4.492	75	4.492	216.667	4.492	408.333
	4.496	100	4.496	200	4.496	375
	4.5	125	4.5	200	4.5	383.333
	4.504	108.333	4.504	241.667	4.504	408.333
	4.508	116.667	4.508	175	4.508	416.667
	4.512	75	4.512	258.333	4.512	433.333
	4.516	66.6667	4.516	241.667	4.516	391.667
	4.52	66.6667	4.52	166.667	4.52	375
	4.524	108.333	4.524	216.667	4.524	375
	4.528	83.3333	4.528	200	4.528	425
	4.532	108.333	4.532	200	4.532	400
	4.536	66.6667	4.536	216.667	4.536	375
	4.54	66.6667	4.54	183.333	4.54	383.333
	4.544	50	4.544	250	4.544	433.333
	4.548	91.6667	4.548	233.333	4.548	425
	4.552	125	4.552	225	4.552	383.333
	4.556	91.6667	4.556	250	4.556	400
	4.56	66.6667	4.56	225	4.56	350
	4.564	91.6667	4.564	283.333	4.564	408.333
	4.568	66.6667	4.568	183.333	4.568	408.333
	4.572	83.3333	4.572	266.667	4.572	416.667
	4.576	125	4.576	250	4.576	383.333
	4.58	66.6667	4.58	208.333	4.58	433.333
	4.584	91.6667	4.584	233.333	4.584	350
	4.588	75	4.588	200	4.588	433.333
	4.592	91.6667	4.592	183.333	4.592	358.333
	4.596	141.667	4.596	225	4.596	375
	4.6	58.3333	4.6	200	4.6	366.667
	4.604	141.667	4.604	191.667	4.604	366.667
	4.608	66.6667	4.608	216.667	4.608	400
	4.612	83.3333	4.612	241.667	4.612	375
	4.616	91.6667	4.616	250	4.616	391.667
	4.62	108.333	4.62	200	4.62	358.333
	4.624	141.667	4.624	258.333	4.624	408.333
	4.628	125	4.628	225	4.628	425
	4.632	66.6667	4.632	250	4.632	425
	4.636	100	4.636	191.667	4.636	366.667
	4.64	83.3333	4.64	191.667	4.64	350
	4.644	50	4.644	275	4.644	366.667
	4.648	100	4.648	200	4.648	400
	4.652	116.667	4.652	191.667	4.652	391.667
	4.656	116.667	4.656	200	4.656	416.667
	4.66	91.6667	4.66	200	4.66	408.333
	4.664	58.3333	4.664	225	4.664	375
	4.668	116.667	4.668	191.667	4.668	366.667
	4.672	83.3333	4.672	183.333	4.672	383.333
	4.676	100	4.676	233.333	4.676	458.333
	4.68	91.6667	4.68	258.333	4.68	358.333
	4.684	33.3333	4.684	191.667	4.684	358.333
	4.688	83.3333	4.688	200	4.688	375
	4.692	91.6667	4.692	291.667	4.692	350
	4.696	75	4.696	208.333	4.696	408.333
	4.7	100	4.7	183.333	4.7	375
	4.704	108.333	4.704	233.333	4.704	366.667
	4.708	41.6667	4.708	241.667	4.708	391.667
	4.712	58.3333	4.712	250	4.712	366.667
	4.716	66.6667	4.716	216.667	4.716	341.667
	4.72	58.3333	4.72	208.333	4.72	341.667
	4.724	66.6667	4.724	183.333	4.724	383.333
	4.728	91.6667	4.728	208.333	4.728	350
	4.732	100	4.732	200	4.732	391.667
	4.736	91.6667	4.736	275	4.736	366.667
	4.74	108.333	4.74	175	4.74	366.667
	4.744	133.333	4.744	191.667	4.744	358.333
	4.748	100	4.748	158.333	4.748	383.333
	4.752	66.6667	4.752	191.667	4.752	383.333
	4.756	108.333	4.756	225	4.756	366.667
	4.76	100	4.76	275	4.76	383.333
	4.764	116.667	4.764	200	4.764	391.667
	4.768	83.3333	4.768	191.667	4.768	425
	4.772	116.667	4.772	175	4.772	375
	4.776	75	4.776	208.333	4.776	375
	4.78	41.6667	4.78	208.333	4.78	358.333
	4.784	58.3333	4.784	250	4.784	333.333
	4.788	66.6667	4.788	191.667	4.788	350
	4.792	100	4.792	233.333	4.792	433.333
	4.796	108.333	4.796	216.667	4.796	400
	4.8	75	4.8	175	4.8	375
	4.804	141.667	4.804	225	4.804	391.667
	4.808	58.3333	4.808	183.333	4.808	425
	4.812	58.3333	4.812	241.667	4.812	375
	4.816	66.6667	4.816	191.667	4.816	366.667
	4.82	125	4.82	266.667	4.82	408.333
	4.824	75	4.824	241.667	4.824	416.667
	4.828	150	4.828	200	4.828	391.667
	4.832	100	4.832	241.667	4.832	341.667
	4.836	58.3333	4.836	275	4.836	391.667
	4.84	66.6667	4.84	233.333	4.84	408.333
	4.844	108.333	4.844	250	4.844	358.333
	4.848	66.6667	4.848	141.667	4.848	391.667
	4.852	100	4.852	200	4.852	366.667
	4.856	41.6667	4.856	175	4.856	366.667
	4.86	66.6667	4.86	200	4.86	375
	4.864	50	4.864	208.333	4.864	358.333
	4.868	125	4.868	158.333	4.868	391.667
	4.872	91.6667	4.872	275	4.872	383.333
	4.876	66.6667	4.876	216.667	4.876	425
	4.88	66.6667	4.88	225	4.88	383.333
	4.884	50	4.884	191.667	4.884	450
	4.888	91.6667	4.888	200	4.888	375
	4.892	75	4.892	225	4.892	383.333
	4.896	91.6667	4.896	233.333	4.896	366.667
	4.9	116.667	4.9	200	4.9	416.667
	4.904	75	4.904	225	4.904	400
	4.908	75	4.908	208.333	4.908	375
	4.912	83.3333	4.912	283.333	4.912	400
	4.916	125	4.916	166.667	4.916	358.333
	4.92	108.333	4.92	233.333	4.92	391.667
	4.924	91.6667	4.924	175	4.924	400
	4.928	75	4.928	225	4.928	366.667
	4.932	33.3333	4.932	225	4.932	466.667
	4.936	83.3333	4.936	241.667	4.936	375
	4.94	83.3333	4.94	200	4.94	333.333
	4.944	158.333	4.944	250	4.944	358.333
	4.948	33.3333	4.948	216.667	4.948	366.667
	4.952	41.6667	4.952	191.667	4.952	408.333
	4.956	91.6667	4.956	216.667	4.956	358.333
	4.96	58.3333	4.96	216.667	4.96	375
	4.964	133.333	4.964	191.667	4.964	333.333
	4.968	125	4.968	158.333	4.968	383.333
	4.972	108.333	4.972	233.333	4.972	366.667
	4.976	41.6667	4.976	183.333	4.976	408.333
	4.98	58.3333	4.98	216.667	4.98	383.333
	4.984	100	4.984	266.667	4.984	366.667
	4.988	133.333	4.988	191.667	4.988	358.333
	4.992	50	4.992	158.333	4.992	383.333
	4.996	83.3333	4.996	300	4.996	383.333
	5	83.3333	5	158.333	5	341.667
	5.004	91.6667	5.004	208.333	5.004	450
	5.008	91.6667	5.008	191.667	5.008	416.667
	5.012	100	5.012	225	5.012	341.667
	5.016	75	5.016	250	5.016	408.333
	5.02	100	5.02	233.333	5.02	383.333
	5.024	116.667	5.024	258.333	5.024	358.333
	5.028	66.6667	5.028	216.667	5.028	391.667
	5.032	191.667	5.032	241.667	5.032	400
	5.036	75	5.036	216.667	5.036	450
	5.04	75	5.04	283.333	5.04	441.667
	5.044	75	5.044	208.333	5.044	408.333
	5.048	125	5.048	166.667	5.048	450
	5.052	108.333	5.052	208.333	5.052	366.667
	5.056	66.6667	5.056	258.333	5.056	391.667
	5.06	75	5.06	200	5.06	408.333
	5.064	66.6667	5.064	216.667	5.064	425
	5.068	91.6667	5.068	208.333	5.068	441.667
	5.072	166.667	5.072	241.667	5.072	375
	5.076	91.6667	5.076	183.333	5.076	441.667
	5.08	75	5.08	283.333	5.08	466.667
	5.084	83.3333	5.084	216.667	5.084	341.667
	5.088	125	5.088	275	5.088	483.333
	5.092	66.6667	5.092	208.333	5.092	350
	5.096	108.333	5.096	225	5.096	391.667
	5.1	66.6667	5.1	225	5.1	366.667
	5.104	91.6667	5.104	233.333	5.104	375
	5.108	75	5.108	208.333	5.108	383.333
	5.112	100	5.112	150	5.112	441.667
	5.116	66.6667	5.116	241.667	5.116	366.667
	5.12	83.3333	5.12	250	5.12	408.333
	5.124	100	5.124	283.333	5.124	433.333
	5.128	83.3333	5.128	216.667	5.128	375
	5.132	100	5.132	266.667	5.132	375
	5.136	50	5.136	233.333	5.136	333.333
	5.14	75	5.14	233.333	5.14	441.667
	5.144	41.6667	5.144	233.333	5.144	416.667
	5.148	91.6667	5.148	216.667	5.148	383.333
	5.152	100	5.152	208.333	5.152	391.667
	5.156	83.3333	5.156	216.667	5.156	441.667
	5.16	50	5.16	216.667	5.16	391.667
	5.164	116.667	5.164	183.333	5.164	375
	5.168	108.333	5.168	208.333	5.168	366.667
	5.172	116.667	5.172	225	5.172	408.333
	5.176	108.333	5.176	191.667	5.176	408.333
	5.18	75	5.18	250	5.18	400
	5.184	116.667	5.184	208.333	5.184	425
	5.188	50	5.188	191.667	5.188	366.667
	5.192	58.3333	5.192	200	5.192	350
	5.196	91.6667	5.196	200	5.196	416.667
	5.2	108.333	5.2	241.667	5.2	425
	5.204	75	5.204	166.667	5.204	433.333
	5.208	58.3333	5.208	216.667	5.208	375
	5.212	150	5.212	225	5.212	383.333
	5.216	125	5.216	200	5.216	433.333
	5.22	108.333	5.22	250	5.22	391.667
	5.224	91.6667	5.224	183.333	5.224	366.667
	5.228	58.3333	5.228	175	5.228	400
	5.232	100	5.232	225	5.232	358.333
	5.236	100	5.236	216.667	5.236	425
	5.24	108.333	5.24	250	5.24	358.333
	5.244	100	5.244	225	5.244	450
	5.248	108.333	5.248	191.667	5.248	350
	5.252	108.333	5.252	233.333	5.252	341.667
	5.256	125	5.256	233.333	5.256	391.667
	5.26	108.333	5.26	225	5.26	375
	5.264	91.6667	5.264	183.333	5.264	383.333
	5.268	83.3333	5.268	250	5.268	383.333
	5.272	108.333	5.272	208.333	5.272	383.333
	5.276	100	5.276	250	5.276	358.333
	5.28	166.667	5.28	275	5.28	400
	5.284	75	5.284	250	5.284	391.667
	5.288	91.6667	5.288	291.667	5.288	400
	5.292	83.3333	5.292	258.333	5.292	400
	5.296	58.3333	5.296	225	5.296	400
	5.3	133.333	5.3	191.667	5.3	366.667
	5.304	91.6667	5.304	183.333	5.304	391.667
	5.308	125	5.308	216.667	5.308	408.333
	5.312	108.333	5.312	258.333	5.312	391.667
	5.316	116.667	5.316	233.333	5.316	358.333
	5.32	91.6667	5.32	250	5.32	416.667
	5.324	141.667	5.324	208.333	5.324	366.667
	5.328	83.3333	5.328	208.333	5.328	383.333
	5.332	133.333	5.332	258.333	5.332	391.667
	5.336	108.333	5.336	191.667	5.336	433.333
	5.34	116.667	5.34	283.333	5.34	375
	5.344	58.3333	5.344	158.333	5.344	366.667
	5.348	175	5.348	216.667	5.348	383.333
	5.352	58.3333	5.352	258.333	5.352	350
	5.356	133.333	5.356	225	5.356	341.667
	5.36	125	5.36	275	5.36	391.667
	5.364	58.3333	5.364	250	5.364	408.333
	5.368	83.3333	5.368	250	5.368	375
	5.372	83.3333	5.372	275	5.372	383.333
	5.376	91.6667	5.376	225	5.376	400
	5.38	58.3333	5.38	275	5.38	400
	5.384	166.667	5.384	266.667	5.384	383.333
	5.388	116.667	5.388	250	5.388	366.667
	5.392	83.3333	5.392	183.333	5.392	358.333
	5.396	33.3333	5.396	233.333	5.396	358.333
	5.4	108.333	5.4	200	5.4	391.667
	5.404	66.6667	5.404	225	5.404	433.333
	5.408	83.3333	5.408	233.333	5.408	375
	5.412	100	5.412	266.667	5.412	391.667
	5.416	100	5.416	308.333	5.416	433.333
	5.42	75	5.42	216.667	5.42	375
	5.424	100	5.424	216.667	5.424	391.667
	5.428	116.667	5.428	233.333	5.428	391.667
	5.432	66.6667	5.432	208.333	5.432	358.333
	5.436	108.333	5.436	233.333	5.436	450
	5.44	100	5.44	283.333	5.44	441.667
	5.444	50	5.444	175	5.444	400
	5.448	116.667	5.448	241.667	5.448	408.333
	5.452	58.3333	5.452	233.333	5.452	350
	5.456	141.667	5.456	191.667	5.456	400
	5.46	75	5.46	208.333	5.46	391.667
	5.464	141.667	5.464	225	5.464	383.333
	5.468	91.6667	5.468	233.333	5.468	375
	5.472	83.3333	5.472	233.333	5.472	350
	5.476	141.667	5.476	241.667	5.476	408.333
	5.48	75	5.48	225	5.48	391.667
	5.484	83.3333	5.484	175	5.484	400
	5.488	83.3333	5.488	241.667	5.488	391.667
	5.492	91.6667	5.492	233.333	5.492	408.333
	5.496	75	5.496	216.667	5.496	375
	5.5	100	5.5	191.667	5.5	383.333
	5.504	125	5.504	200	5.504	408.333
	5.508	108.333	5.508	233.333	5.508	416.667
	5.512	116.667	5.512	183.333	5.512	433.333
	5.516	75	5.516	183.333	5.516	391.667
	5.52	66.6667	5.52	233.333	5.52	375
	5.524	66.6667	5.524	216.667	5.524	375
	5.528	108.333	5.528	183.333	5.528	425
	5.532	83.3333	5.532	241.667	5.532	400
	5.536	108.333	5.536	216.667	5.536	375
	5.54	66.6667	5.54	200	5.54	383.333
	5.544	66.6667	5.544	283.333	5.544	433.333
	5.548	50	5.548	216.667	5.548	425
	5.552	91.6667	5.552	283.333	5.552	383.333
	5.556	125	5.556	183.333	5.556	400
	5.56	91.6667	5.56	283.333	5.56	350
	5.564	66.6667	5.564	158.333	5.564	408.333
	5.568	91.6667	5.568	250	5.568	408.333
	5.572	66.6667	5.572	200	5.572	416.667
	5.576	83.3333	5.576	225	5.576	383.333
	5.58	125	5.58	200	5.58	433.333
	5.584	66.6667	5.584	191.667	5.584	350
	5.588	91.6667	5.588	200	5.588	433.333
	5.592	75	5.592	250	5.592	358.333
	5.596	91.6667	5.596	216.667	5.596	375
	5.6	141.667	5.6	183.333	5.6	366.667
	5.604	58.3333	5.604	208.333	5.604	366.667
	5.608	141.667	5.608	158.333	5.608	400
	5.612	66.6667	5.612	233.333	5.612	375
	5.616	83.3333	5.616	191.667	5.616	391.667
	5.62	91.6667	5.62	233.333	5.62	358.333
	5.624	108.333	5.624	258.333	5.624	408.333
	5.628	141.667	5.628	216.667	5.628	425
	5.632	125	5.632	191.667	5.632	425
	5.636	66.6667	5.636	241.667	5.636	366.667
	5.64	100	5.64	200	5.64	350
	5.644	83.3333	5.644	216.667	5.644	366.667
	5.648	50	5.648	208.333	5.648	400
	5.652	100	5.652	291.667	5.652	391.667
	5.656	116.667	5.656	208.333	5.656	416.667
	5.66	116.667	5.66	225	5.66	408.333
	5.664	91.6667	5.664	241.667	5.664	375
	5.668	58.3333	5.668	241.667	5.668	366.667
	5.672	116.667	5.672	241.667	5.672	383.333
	5.676	83.3333	5.676	225	5.676	458.333
	5.68	100	5.68	200	5.68	358.333
	5.684	91.6667	5.684	191.667	5.684	358.333
	5.688	33.3333	5.688	233.333	5.688	375
	5.692	83.3333	5.692	216.667	5.692	350
	5.696	91.6667	5.696	225	5.696	408.333
	5.7	75	5.7	291.667	5.7	375
	5.704	100	5.704	233.333	5.704	366.667
	5.708	108.333	5.708	258.333	5.708	391.667
	5.712	41.6667	5.712	200	5.712	366.667
	5.716	58.3333	5.716	233.333	5.716	341.667
	5.72	66.6667	5.72	200	5.72	341.667
	5.724	58.3333	5.724	233.333	5.724	383.333
	5.728	66.6667	5.728	283.333	5.728	350
	5.732	91.6667	5.732	258.333	5.732	391.667
	5.736	100	5.736	208.333	5.736	366.667
	5.74	91.6667	5.74	300	5.74	366.667
	5.744	108.333	5.744	266.667	5.744	358.333
	5.748	133.333	5.748	250	5.748	383.333
	5.752	100	5.752	233.333	5.752	383.333
	5.756	66.6667	5.756	208.333	5.756	366.667
	5.76	108.333	5.76	258.333	5.76	383.333
	5.764	100	5.764	258.333	5.764	391.667
	5.768	116.667	5.768	200	5.768	425
	5.772	83.3333	5.772	200	5.772	375
	5.776	116.667	5.776	266.667	5.776	375
	5.78	75	5.78	191.667	5.78	358.333
	5.784	41.6667	5.784	158.333	5.784	333.333
	5.788	58.3333	5.788	233.333	5.788	350
	5.792	66.6667	5.792	241.667	5.792	433.333
	5.796	100	5.796	266.667	5.796	400
	5.8	108.333	5.8	225	5.8	375
	5.804	75	5.804	258.333	5.804	391.667
	5.808	141.667	5.808	191.667	5.808	425
	5.812	58.3333	5.812	208.333	5.812	375
	5.816	58.3333	5.816	200	5.816	366.667
	5.82	66.6667	5.82	183.333	5.82	408.333
	5.824	125	5.824	233.333	5.824	416.667
	5.828	75	5.828	208.333	5.828	391.667
	5.832	150	5.832	200	5.832	341.667
	5.836	100	5.836	200	5.836	391.667
	5.84	58.3333	5.84	208.333	5.84	408.333
	5.844	66.6667	5.844	258.333	5.844	358.333
	5.848	108.333	5.848	233.333	5.848	391.667
	5.852	66.6667	5.852	200	5.852	366.667
	5.856	100	5.856	241.667	5.856	366.667
	5.86	41.6667	5.86	233.333	5.86	375
	5.864	66.6667	5.864	250	5.864	358.333
	5.868	50	5.868	275	5.868	391.667
	5.872	125	5.872	266.667	5.872	383.333
	5.876	91.6667	5.876	208.333	5.876	425
	5.88	66.6667	5.88	258.333	5.88	383.333
	5.884	66.6667	5.884	225	5.884	450
	5.888	50	5.888	241.667	5.888	375
	5.892	91.6667	5.892	175	5.892	383.333
	5.896	75	5.896	225	5.896	366.667
	5.9	91.6667	5.9	241.667	5.9	416.667
	5.904	116.667	5.904	200	5.904	400
	5.908	75	5.908	216.667	5.908	375
	5.912	75	5.912	233.333	5.912	400
	5.916	83.3333	5.916	250	5.916	358.333
	5.92	125	5.92	183.333	5.92	391.667
	5.924	108.333	5.924	208.333	5.924	400
	5.928	91.6667	5.928	150	5.928	366.667
	5.932	75	5.932	191.667	5.932	466.667
	5.936	33.3333	5.936	225	5.936	375
	5.94	83.3333	5.94	191.667	5.94	333.333
	5.944	83.3333	5.944	166.667	5.944	358.333
	5.948	158.333	5.948	258.333	5.948	366.667
	5.952	33.3333	5.952	233.333	5.952	408.333
	5.956	41.6667	5.956	250	5.956	358.333
	5.96	91.6667	5.96	233.333	5.96	375
	5.964	58.3333	5.964	241.667	5.964	333.333
	5.968	133.333	5.968	233.333	5.968	383.333
	5.972	125	5.972	241.667	5.972	366.667
	5.976	108.333	5.976	250	5.976	408.333
	5.98	41.6667	5.98	266.667	5.98	383.333
	5.984	58.3333	5.984	208.333	5.984	366.667
	5.988	100	5.988	266.667	5.988	358.333
	5.992	133.333	5.992	200	5.992	383.333
	5.996	50	5.996	225	5.996	383.333
	6	83.3333	6	258.333	6	341.667
	6.004	91.6667	6.004	233.333	6.004	350
	6.008	91.6667	6.008	225	6.008	375
	6.012	100	6.012	225	6.012	383.333
	6.016	75	6.016	241.667	6.016	400
	6.02	100	6.02	191.667	6.02	358.333
	6.024	116.667	6.024	241.667	6.024	383.333
	6.028	66.6667	6.028	216.667	6.028	341.667
	6.032	191.667	6.032	200	6.032	408.333
	6.036	75	6.036	191.667	6.036	400
	6.04	75	6.04	191.667	6.04	358.333
	6.044	75	6.044	250	6.044	375
	6.048	125	6.048	216.667	6.048	400
	6.052	108.333	6.052	208.333	6.052	383.333
	6.056	66.6667	6.056	200	6.056	375
	6.06	75	6.06	191.667	6.06	391.667
	6.064	66.6667	6.064	208.333	6.064	383.333
	6.068	91.6667	6.068	225	6.068	325
	6.072	166.667	6.072	266.667	6.072	375
	6.076	91.6667	6.076	233.333	6.076	375
	6.08	75	6.08	225	6.08	416.667
	6.084	83.3333	6.084	200	6.084	366.667
	6.088	125	6.088	225	6.088	350
	6.092	66.6667	6.092	208.333	6.092	383.333
	6.096	108.333	6.096	208.333	6.096	383.333
	6.1	66.6667	6.1	233.333	6.1	400
	6.104	91.6667	6.104	200	6.104	375
	6.108	75	6.108	200	6.108	375
	6.112	100	6.112	216.667	6.112	375
	6.116	66.6667	6.116	250	6.116	341.667
	6.12	83.3333	6.12	250	6.12	383.333
	6.124	100	6.124	200	6.124	375
	6.128	83.3333	6.128	275	6.128	375
	6.132	100	6.132	208.333	6.132	358.333
	6.136	50	6.136	250	6.136	333.333
	6.14	75	6.14	183.333	6.14	416.667
	6.144	41.6667	6.144	183.333	6.144	375
	6.148	91.6667	6.148	208.333	6.148	350
	6.152	100	6.152	225	6.152	433.333
	6.156	83.3333	6.156	191.667	6.156	366.667
	6.16	50	6.16	258.333	6.16	400
	6.164	116.667	6.164	216.667	6.164	400
	6.168	108.333	6.168	200	6.168	416.667
	6.172	116.667	6.172	175	6.172	416.667
	6.176	108.333	6.176	216.667	6.176	383.333
	6.18	75	6.18	191.667	6.18	391.667
	6.184	116.667	6.184	250	6.184	383.333
	6.188	50	6.188	208.333	6.188	425
	6.192	58.3333	6.192	191.667	6.192	333.333
	6.196	91.6667	6.196	208.333	6.196	341.667
	6.2	116.667	6.2	208.333	6.2	358.333
	6.204	66.6667	6.204	225	6.204	358.333
	6.208	133.333	6.208	200	6.208	400
	6.212	125	6.212	241.667	6.212	391.667
	6.216	100	6.216	183.333	6.216	400
	6.22	108.333	6.22	250	6.22	425
	6.224	91.6667	6.224	250	6.224	383.333
	6.228	66.6667	6.228	216.667	6.228	333.333
	6.232	66.6667	6.232	191.667	6.232	358.333
	6.236	75	6.236	208.333	6.236	400
	6.24	83.3333	6.24	225	6.24	375
	6.244	108.333	6.244	225	6.244	358.333
	6.248	125	6.248	225	6.248	391.667
	6.252	41.6667	6.252	216.667	6.252	350
	6.256	33.3333	6.256	225	6.256	366.667
	6.26	75	6.26	225	6.26	350
	6.264	66.6667	6.264	216.667	6.264	375
	6.268	66.6667	6.268	250	6.268	375
	6.272	75	6.272	208.333	6.272	400
	6.276	91.6667	6.276	233.333	6.276	375
	6.28	108.333	6.28	225	6.28	416.667
	6.284	91.6667	6.284	191.667	6.284	358.333
	6.288	75	6.288	216.667	6.288	391.667
	6.292	66.6667	6.292	225	6.292	358.333
	6.296	133.333	6.296	283.333	6.296	358.333
	6.3	100	6.3	208.333	6.3	383.333
	6.304	83.3333	6.304	216.667	6.304	408.333
	6.308	100	6.308	191.667	6.308	366.667
	6.312	41.6667	6.312	225	6.312	350
	6.316	75	6.316	225	6.316	383.333
	6.32	83.3333	6.32	216.667	6.32	391.667
	6.324	116.667	6.324	275	6.324	358.333
	6.328	125	6.328	258.333	6.328	375
	6.332	83.3333	6.332	216.667	6.332	408.333
	6.336	83.3333	6.336	208.333	6.336	333.333
	6.34	91.6667	6.34	225	6.34	366.667
	6.344	91.6667	6.344	200	6.344	366.667
	6.348	66.6667	6.348	241.667	6.348	358.333
	6.352	125	6.352	200	6.352	375
	6.356	91.6667	6.356	275	6.356	408.333
	6.36	133.333	6.36	241.667	6.36	358.333
	6.364	58.3333	6.364	208.333	6.364	383.333
	6.368	50	6.368	208.333	6.368	400
	6.372	50	6.372	266.667	6.372	375
	6.376	50	6.376	200	6.376	358.333
	6.38	66.6667	6.38	241.667	6.38	375
	6.384	150	6.384	225	6.384	375
	6.388	50	6.388	241.667	6.388	375
	6.392	116.667	6.392	208.333	6.392	366.667
	6.396	83.3333	6.396	266.667	6.396	366.667
	6.4	58.3333	6.4	216.667	6.4	358.333
	6.404	91.6667	6.404	225	6.404	400
	6.408	75	6.408	250	6.408	333.333
	6.412	116.667	6.412	225	6.412	416.667
	6.416	91.6667	6.416	308.333	6.416	358.333
	6.42	58.3333	6.42	208.333	6.42	358.333
	6.424	58.3333	6.424	175	6.424	450
	6.428	58.3333	6.428	225	6.428	400
	6.432	66.6667	6.432	250	6.432	366.667
	6.436	108.333	6.436	216.667	6.436	358.333
	6.44	66.6667	6.44	216.667	6.44	358.333
	6.444	83.3333	6.444	208.333	6.444	375
	6.448	141.667	6.448	208.333	6.448	375
	6.452	83.3333	6.452	183.333	6.452	350
	6.456	50	6.456	241.667	6.456	408.333
	6.46	25	6.46	216.667	6.46	383.333
	6.464	25	6.464	183.333	6.464	366.667
	6.468	75	6.468	183.333	6.468	383.333
	6.472	125	6.472	216.667	6.472	350
	6.476	75	6.476	191.667	6.476	400
	6.48	125	6.48	191.667	6.48	383.333
	6.484	66.6667	6.484	158.333	6.484	325
	6.488	41.6667	6.488	225	6.488	433.333
	6.492	58.3333	6.492	233.333	6.492	358.333
	6.496	75	6.496	233.333	6.496	383.333
	6.5	83.3333	6.5	208.333	6.5	350
	6.504	25	6.504	216.667	6.504	391.667
	6.508	108.333	6.508	225	6.508	375
	6.512	108.333	6.512	200	6.512	441.667
	6.516	91.6667	6.516	225	6.516	366.667
	6.52	75	6.52	208.333	6.52	375
	6.524	41.6667	6.524	191.667	6.524	400
	6.528	75	6.528	250	6.528	341.667
	6.532	50	6.532	183.333	6.532	375
	6.536	83.3333	6.536	241.667	6.536	408.333
	6.54	33.3333	6.54	225	6.54	400
	6.544	66.6667	6.544	250	6.544	391.667
	6.548	66.6667	6.548	225	6.548	416.667
	6.552	50	6.552	208.333	6.552	400
	6.556	116.667	6.556	191.667	6.556	391.667
	6.56	41.6667	6.56	225	6.56	383.333
	6.564	41.6667	6.564	216.667	6.564	358.333
	6.568	83.3333	6.568	200	6.568	400
	6.572	116.667	6.572	225	6.572	358.333
	6.576	58.3333	6.576	216.667	6.576	383.333
	6.58	58.3333	6.58	258.333	6.58	383.333
	6.584	133.333	6.584	241.667	6.584	383.333
	6.588	75	6.588	191.667	6.588	350
	6.592	75	6.592	225	6.592	383.333
	6.596	83.3333	6.596	216.667	6.596	416.667
	6.6	100	6.6	241.667	6.6	366.667
	6.604	75	6.604	191.667	6.604	366.667
	6.608	41.6667	6.608	183.333	6.608	358.333
	6.612	83.3333	6.612	225	6.612	350
	6.616	91.6667	6.616	225	6.616	366.667
	6.62	66.6667	6.62	208.333	6.62	366.667
	6.624	108.333	6.624	208.333	6.624	358.333
	6.628	75	6.628	208.333	6.628	375
	6.632	91.6667	6.632	200	6.632	366.667
	6.636	75	6.636	208.333	6.636	383.333
	6.64	75	6.64	241.667	6.64	383.333
	6.644	58.3333	6.644	225	6.644	375
	6.648	58.3333	6.648	200	6.648	391.667
	6.652	83.3333	6.652	250	6.652	341.667
	6.656	100	6.656	200	6.656	358.333
	6.66	75	6.66	258.333	6.66	350
	6.664	91.6667	6.664	250	6.664	383.333
	6.668	83.3333	6.668	208.333	6.668	408.333
	6.672	125	6.672	233.333	6.672	400
	6.676	50	6.676	233.333	6.676	366.667
	6.68	91.6667	6.68	191.667	6.68	391.667
	6.684	125	6.684	233.333	6.684	383.333
	6.688	66.6667	6.688	241.667	6.688	366.667
	6.692	83.3333	6.692	233.333	6.692	333.333
	6.696	91.6667	6.696	183.333	6.696	341.667
	6.7	91.6667	6.7	250	6.7	391.667
	6.704	116.667	6.704	191.667	6.704	350
	6.708	108.333	6.708	208.333	6.708	350
	6.712	100	6.712	208.333	6.712	358.333
	6.716	91.6667	6.716	183.333	6.716	375
	6.72	25	6.72	208.333	6.72	316.667
	6.724	41.6667	6.724	216.667	6.724	425
	6.728	41.6667	6.728	200	6.728	358.333
	6.732	116.667	6.732	200	6.732	425
	6.736	75	6.736	225	6.736	366.667
	6.74	66.6667	6.74	233.333	6.74	341.667
	6.744	91.6667	6.744	183.333	6.744	425
	6.748	58.3333	6.748	233.333	6.748	358.333
	6.752	50	6.752	225	6.752	358.333
	6.756	116.667	6.756	200	6.756	366.667
	6.76	41.6667	6.76	216.667	6.76	333.333
	6.764	125	6.764	233.333	6.764	358.333
	6.768	33.3333	6.768	200	6.768	366.667
	6.772	75	6.772	216.667	6.772	366.667
	6.776	83.3333	6.776	216.667	6.776	433.333
	6.78	100	6.78	191.667	6.78	366.667
	6.784	116.667	6.784	200	6.784	375
	6.788	91.6667	6.788	233.333	6.788	391.667
	6.792	100	6.792	241.667	6.792	358.333
	6.796	133.333	6.796	275	6.796	358.333
	6.8	75	6.8	250	6.8	425
	6.804	116.667	6.804	225	6.804	333.333
	6.808	58.3333	6.808	208.333	6.808	375
	6.812	58.3333	6.812	183.333	6.812	375
	6.816	58.3333	6.816	200	6.816	316.667
	6.82	41.6667	6.82	266.667	6.82	325
	6.824	91.6667	6.824	200	6.824	400
	6.828	91.6667	6.828	208.333	6.828	358.333
	6.832	91.6667	6.832	241.667	6.832	358.333
	6.836	83.3333	6.836	216.667	6.836	416.667
	6.84	83.3333	6.84	241.667	6.84	383.333
	6.844	91.6667	6.844	258.333	6.844	400
	6.848	75	6.848	191.667	6.848	366.667
	6.852	66.6667	6.852	233.333	6.852	391.667
	6.856	58.3333	6.856	191.667	6.856	400
	6.86	66.6667	6.86	250	6.86	350
	6.864	83.3333	6.864	208.333	6.864	375
	6.868	108.333	6.868	191.667	6.868	408.333
	6.872	83.3333	6.872	266.667	6.872	408.333
	6.876	91.6667	6.876	208.333	6.876	350
	6.88	108.333	6.88	233.333	6.88	400
	6.884	50	6.884	241.667	6.884	383.333
	6.888	108.333	6.888	200	6.888	433.333
	6.892	25	6.892	225	6.892	375
	6.896	116.667	6.896	233.333	6.896	391.667
	6.9	83.3333	6.9	208.333	6.9	408.333
	6.904	75	6.904	225	6.904	450
	6.908	158.333	6.908	208.333	6.908	425
	6.912	100	6.912	191.667	6.912	358.333
	6.916	91.6667	6.916	216.667	6.916	375
	6.92	83.3333	6.92	200	6.92	416.667
	6.924	75	6.924	266.667	6.924	375
	6.928	100	6.928	233.333	6.928	383.333
	6.932	108.333	6.932	191.667	6.932	375
	6.936	108.333	6.936	208.333	6.936	391.667
	6.94	100	6.94	175	6.94	383.333
	6.944	33.3333	6.944	183.333	6.944	341.667
	6.948	100	6.948	191.667	6.948	400
	6.952	100	6.952	191.667	6.952	375
	6.956	58.3333	6.956	191.667	6.956	408.333
	6.96	66.6667	6.96	241.667	6.96	383.333
	6.964	91.6667	6.964	233.333	6.964	366.667
	6.968	125	6.968	216.667	6.968	358.333
	6.972	108.333	6.972	200	6.972	358.333
	6.976	100	6.976	208.333	6.976	350
	6.98	91.6667	6.98	266.667	6.98	400
	6.984	75	6.984	275	6.984	316.667
	6.988	125	6.988	233.333	6.988	375
	6.992	83.3333	6.992	200	6.992	408.333
	6.996	125	6.996	266.667	6.996	350
	7	108.333	7	225	7	408.333
	7.004	108.333	7.004	191.667	7.004	366.667
	7.008	83.3333	7.008	208.333	7.008	358.333
	7.012	66.6667	7.012	200	7.012	316.667
	7.016	66.6667	7.016	225	7.016	350
	7.02	108.333	7.02	225	7.02	391.667
	7.024	75	7.024	241.667	7.024	316.667
	7.028	83.3333	7.028	241.667	7.028	358.333
	7.032	108.333	7.032	275	7.032	375
	7.036	108.333	7.036	200	7.036	375
	7.04	83.3333	7.04	191.667	7.04	391.667
	7.044	75	7.044	216.667	7.044	350
	7.048	75	7.048	208.333	7.048	366.667
	7.052	66.6667	7.052	241.667	7.052	383.333
	7.056	75	7.056	208.333	7.056	358.333
	7.06	41.6667	7.06	216.667	7.06	416.667
	7.064	100	7.064	258.333	7.064	391.667
	7.068	116.667	7.068	208.333	7.068	358.333
	7.072	66.6667	7.072	225	7.072	341.667
	7.076	91.6667	7.076	191.667	7.076	366.667
	7.08	50	7.08	233.333	7.08	400
	7.084	91.6667	7.084	191.667	7.084	358.333
	7.088	91.6667	7.088	216.667	7.088	366.667
	7.092	41.6667	7.092	200	7.092	383.333
	7.096	58.3333	7.096	266.667	7.096	341.667
	7.1	91.6667	7.1	216.667	7.1	425
	7.104	50	7.104	241.667	7.104	358.333
	7.108	150	7.108	200	7.108	333.333
	7.112	108.333	7.112	191.667	7.112	375
	7.116	141.667	7.116	225	7.116	400
	7.12	91.6667	7.12	241.667	7.12	358.333
	7.124	58.3333	7.124	191.667	7.124	333.333
	7.128	58.3333	7.128	233.333	7.128	316.667
	7.132	100	7.132	283.333	7.132	391.667
	7.136	116.667	7.136	258.333	7.136	383.333
	7.14	116.667	7.14	225	7.14	375
	7.144	50	7.144	216.667	7.144	383.333
	7.148	66.6667	7.148	200	7.148	366.667
	7.152	100	7.152	225	7.152	383.333
	7.156	83.3333	7.156	216.667	7.156	391.667
	7.16	133.333	7.16	216.667	7.16	408.333
	7.164	116.667	7.164	191.667	7.164	375
	7.168	75	7.168	225	7.168	383.333
	7.172	100	7.172	216.667	7.172	325
	7.176	66.6667	7.176	191.667	7.176	375
	7.18	66.6667	7.18	233.333	7.18	400
	7.184	100	7.184	258.333	7.184	350
	7.188	108.333	7.188	225	7.188	375
	7.192	41.6667	7.192	208.333	7.192	350
	7.196	108.333	7.196	250	7.196	350
	7.2	108.333	7.2	233.333	7.2	366.667
	7.204	100	7.204	208.333	7.204	375
	7.208	133.333	7.208	175	7.208	366.667
	7.212	125	7.212	216.667	7.212	375
	7.216	116.667	7.216	200	7.216	425
	7.22	83.3333	7.22	200	7.22	391.667
	7.224	116.667	7.224	200	7.224	408.333
	7.228	25	7.228	191.667	7.228	408.333
	7.232	66.6667	7.232	216.667	7.232	366.667
	7.236	91.6667	7.236	183.333	7.236	341.667
	7.24	50	7.24	191.667	7.24	408.333
	7.244	75	7.244	216.667	7.244	341.667
	7.248	50	7.248	208.333	7.248	358.333
	7.252	100	7.252	208.333	7.252	391.667
	7.256	133.333	7.256	191.667	7.256	383.333
	7.26	100	7.26	158.333	7.26	358.333
	7.264	108.333	7.264	208.333	7.264	391.667
	7.268	75	7.268	258.333	7.268	366.667
	7.272	83.3333	7.272	200	7.272	366.667
	7.276	100	7.276	191.667	7.276	358.333
	7.28	58.3333	7.28	208.333	7.28	383.333
	7.284	108.333	7.284	291.667	7.284	350
	7.288	83.3333	7.288	241.667	7.288	425
	7.292	116.667	7.292	225	7.292	383.333
	7.296	91.6667	7.296	200	7.296	400
	7.3	50	7.3	216.667	7.3	375
	7.304	66.6667	7.304	208.333	7.304	341.667
	7.308	150	7.308	191.667	7.308	341.667
	7.312	83.3333	7.312	225	7.312	408.333
	7.316	58.3333	7.316	216.667	7.316	375
	7.32	108.333	7.32	208.333	7.32	400
	7.324	91.6667	7.324	166.667	7.324	375
	7.328	75	7.328	250	7.328	408.333
	7.332	58.3333	7.332	241.667	7.332	341.667
	7.336	41.6667	7.336	225	7.336	325
	7.34	91.6667	7.34	216.667	7.34	350
	7.344	58.3333	7.344	225	7.344	441.667
	7.348	91.6667	7.348	250	7.348	391.667
	7.352	83.3333	7.352	208.333	7.352	408.333
	7.356	91.6667	7.356	200	7.356	416.667
	7.36	58.3333	7.36	250	7.36	366.667
	7.364	41.6667	7.364	258.333	7.364	391.667
	7.368	83.3333	7.368	175	7.368	400
	7.372	66.6667	7.372	225	7.372	350
	7.376	91.6667	7.376	166.667	7.376	383.333
	7.38	75	7.38	233.333	7.38	433.333
	7.384	66.6667	7.384	241.667	7.384	383.333
	7.388	133.333	7.388	283.333	7.388	391.667
	7.392	91.6667	7.392	216.667	7.392	391.667
	7.396	75	7.396	250	7.396	350
	7.4	58.3333	7.4	208.333	7.4	400
	7.404	108.333	7.404	216.667	7.404	375
	7.408	125	7.408	241.667	7.408	400
	7.412	83.3333	7.412	216.667	7.412	350
	7.416	66.6667	7.416	225	7.416	366.667
	7.42	100	7.42	191.667	7.42	400
	7.424	50	7.424	241.667	7.424	391.667
	7.428	83.3333	7.428	233.333	7.428	408.333
	7.432	116.667	7.432	183.333	7.432	375
	7.436	50	7.436	208.333	7.436	408.333
	7.44	66.6667	7.44	233.333	7.44	433.333
	7.444	141.667	7.444	233.333	7.444	375
	7.448	125	7.448	183.333	7.448	325
	7.452	41.6667	7.452	258.333	7.452	366.667
	7.456	108.333	7.456	191.667	7.456	375
	7.46	58.3333	7.46	200	7.46	350
	7.464	100	7.464	258.333	7.464	358.333
	7.468	91.6667	7.468	216.667	7.468	408.333
	7.472	58.3333	7.472	233.333	7.472	366.667
	7.476	100	7.476	208.333	7.476	400
	7.48	116.667	7.48	225	7.48	383.333
	7.484	91.6667	7.484	300	7.484	350
	7.488	133.333	7.488	216.667	7.488	366.667
	7.492	100	7.492	191.667	7.492	400
	7.496	66.6667	7.496	241.667	7.496	358.333
	7.5	75	7.5	200	7.5	383.333
	7.504	116.667	7.504	250	7.504	341.667
	7.508	100	7.508	233.333	7.508	375
	7.512	108.333	7.512	183.333	7.512	375
	7.516	116.667	7.516	266.667	7.516	358.333
	7.52	66.6667	7.52	233.333	7.52	375
	7.524	83.3333	7.524	233.333	7.524	408.333
	7.528	100	7.528	225	7.528	350
	7.532	125	7.532	225	7.532	375
	7.536	58.3333	7.536	225	7.536	391.667
	7.54	75	7.54	225	7.54	358.333
	7.544	91.6667	7.544	216.667	7.544	391.667
	7.548	33.3333	7.548	250	7.548	391.667
	7.552	83.3333	7.552	225	7.552	358.333
	7.556	116.667	7.556	241.667	7.556	366.667
	7.56	66.6667	7.56	241.667	7.56	358.333
	7.564	75	7.564	191.667	7.564	366.667
	7.568	75	7.568	175	7.568	391.667
	7.572	41.6667	7.572	225	7.572	366.667
	7.576	83.3333	7.576	216.667	7.576	375
	7.58	66.6667	7.58	241.667	7.58	316.667
	7.584	58.3333	7.584	233.333	7.584	366.667
	7.588	41.6667	7.588	216.667	7.588	408.333
	7.592	83.3333	7.592	216.667	7.592	400
	7.596	100	7.596	200	7.596	375
	7.6	100	7.6	233.333	7.6	366.667
	7.604	83.3333	7.604	208.333	7.604	341.667
	7.608	91.6667	7.608	208.333	7.608	416.667
	7.612	75	7.612	191.667	7.612	400
	7.616	100	7.616	191.667	7.616	383.333
	7.62	108.333	7.62	183.333	7.62	408.333
	7.624	33.3333	7.624	175	7.624	383.333
	7.628	75	7.628	175	7.628	333.333
	7.632	66.6667	7.632	183.333	7.632	375
	7.636	58.3333	7.636	200	7.636	375
	7.64	100	7.64	208.333	7.64	333.333
	7.644	108.333	7.644	225	7.644	358.333
	7.648	150	7.648	208.333	7.648	391.667
	7.652	58.3333	7.652	183.333	7.652	391.667
	7.656	100	7.656	208.333	7.656	375
	7.66	91.6667	7.66	225	7.66	400
	7.664	141.667	7.664	216.667	7.664	366.667
	7.668	41.6667	7.668	191.667	7.668	416.667
	7.672	91.6667	7.672	250	7.672	358.333
	7.676	58.3333	7.676	200	7.676	383.333
	7.68	66.6667	7.68	183.333	7.68	366.667
	7.684	58.3333	7.684	233.333	7.684	391.667
	7.688	108.333	7.688	200	7.688	350
	7.692	133.333	7.692	250	7.692	400
	7.696	83.3333	7.696	275	7.696	375
	7.7	83.3333	7.7	216.667	7.7	425
	7.704	83.3333	7.704	241.667	7.704	391.667
	7.708	83.3333	7.708	225	7.708	391.667
	7.712	91.6667	7.712	258.333	7.712	383.333
	7.716	91.6667	7.716	266.667	7.716	425
	7.72	50	7.72	241.667	7.72	358.333
	7.724	41.6667	7.724	191.667	7.724	375
	7.728	100	7.728	233.333	7.728	366.667
	7.732	83.3333	7.732	250	7.732	358.333
	7.736	83.3333	7.736	233.333	7.736	333.333
	7.74	58.3333	7.74	233.333	7.74	358.333
	7.744	100	7.744	208.333	7.744	391.667
	7.748	100	7.748	266.667	7.748	366.667
	7.752	91.6667	7.752	225	7.752	341.667
	7.756	50	7.756	216.667	7.756	350
	7.76	108.333	7.76	200	7.76	383.333
	7.764	16.6667	7.764	200	7.764	425
	7.768	100	7.768	233.333	7.768	333.333
	7.772	91.6667	7.772	225	7.772	400
	7.776	100	7.776	191.667	7.776	391.667
	7.78	75	7.78	250	7.78	358.333
	7.784	91.6667	7.784	216.667	7.784	441.667
	7.788	41.6667	7.788	225	7.788	391.667
	7.792	100	7.792	208.333	7.792	375
	7.796	108.333	7.796	291.667	7.796	391.667
	7.8	58.3333	7.8	216.667	7.8	383.333
	7.804	108.333	7.804	200	7.804	400
	7.808	83.3333	7.808	216.667	7.808	358.333
	7.812	141.667	7.812	225	7.812	416.667
	7.816	75	7.816	216.667	7.816	375
	7.82	133.333	7.82	183.333	7.82	400
	7.824	83.3333	7.824	250	7.824	350
	7.828	41.6667	7.828	208.333	7.828	391.667
	7.832	83.3333	7.832	250	7.832	433.333
	7.836	100	7.836	208.333	7.836	400
	7.84	75	7.84	225	7.84	425
	7.844	83.3333	7.844	241.667	7.844	391.667
	7.848	91.6667	7.848	175	7.848	383.333
	7.852	75	7.852	175	7.852	391.667
	7.856	66.6667	7.856	200	7.856	391.667
	7.86	75	7.86	266.667	7.86	366.667
	7.864	75	7.864	225	7.864	341.667
	7.868	100	7.868	183.333	7.868	400
	7.872	125	7.872	200	7.872	383.333
	7.876	100	7.876	250	7.876	350
	7.88	75	7.88	191.667	7.88	358.333
	7.884	58.3333	7.884	166.667	7.884	366.667
	7.888	66.6667	7.888	191.667	7.888	383.333
	7.892	58.3333	7.892	216.667	7.892	416.667
	7.896	100	7.896	225	7.896	383.333
	7.9	83.3333	7.9	233.333	7.9	358.333
	7.904	116.667	7.904	191.667	7.904	383.333
	7.908	125	7.908	208.333	7.908	375
	7.912	133.333	7.912	183.333	7.912	383.333
	7.916	83.3333	7.916	233.333	7.916	350
	7.92	50	7.92	216.667	7.92	391.667
	7.924	58.3333	7.924	241.667	7.924	408.333
	7.928	58.3333	7.928	216.667	7.928	341.667
	7.932	91.6667	7.932	200	7.932	350
	7.936	83.3333	7.936	208.333	7.936	366.667
	7.94	25	7.94	241.667	7.94	400
	7.944	91.6667	7.944	191.667	7.944	391.667
	7.948	75	7.948	266.667	7.948	400
	7.952	108.333	7.952	250	7.952	350
	7.956	75	7.956	183.333	7.956	333.333
	7.96	50	7.96	241.667	7.96	383.333
	7.964	108.333	7.964	208.333	7.964	391.667
	7.968	158.333	7.968	208.333	7.968	366.667
	7.972	100	7.972	200	7.972	350
	7.976	75	7.976	200	7.976	416.667
	7.98	91.6667	7.98	216.667	7.98	333.333
	7.984	50	7.984	233.333	7.984	350
	7.988	75	7.988	208.333	7.988	391.667
	7.992	33.3333	7.992	208.333	7.992	375
	7.996	33.3333	7.996	208.333	7.996	366.667
	8	66.6667	8	216.667	8	375
	8.004	50	8.004	233.333	8.004	375
	8.008	100	8.008	208.333	8.008	350
	8.012	133.333	8.012	250	8.012	383.333
	8.016	58.3333	8.016	258.333	8.016	366.667
	8.02	66.6667	8.02	216.667	8.02	408.333
	8.024	41.6667	8.024	200	8.024	400
	8.028	75	8.028	250	8.028	400
	8.032	75	8.032	191.667	8.032	350
	8.036	150	8.036	241.667	8.036	316.667
	8.04	83.3333	8.04	208.333	8.04	408.333
	8.044	91.6667	8.044	200	8.044	383.333
	8.048	66.6667	8.048	250	8.048	425
	8.052	58.3333	8.052	216.667	8.052	375
	8.056	83.3333	8.056	183.333	8.056	483.333
	8.06	91.6667	8.06	233.333	8.06	333.333
	8.064	91.6667	8.064	200	8.064	358.333
	8.068	75	8.068	208.333	8.068	358.333
	8.072	158.333	8.072	275	8.072	391.667
	8.076	33.3333	8.076	208.333	8.076	375
	8.08	116.667	8.08	208.333	8.08	416.667
	8.084	83.3333	8.084	233.333	8.084	391.667
	8.088	116.667	8.088	200	8.088	416.667
	8.092	91.6667	8.092	175	8.092	358.333
	8.096	75	8.096	258.333	8.096	441.667
	8.1	66.6667	8.1	233.333	8.1	391.667
	8.104	100	8.104	233.333	8.104	391.667
	8.108	58.3333	8.108	200	8.108	391.667
	8.112	150	8.112	225	8.112	366.667
	8.116	66.6667	8.116	183.333	8.116	408.333
	8.12	66.6667	8.12	208.333	8.12	366.667
	8.124	125	8.124	183.333	8.124	366.667
	8.128	91.6667	8.128	250	8.128	375
	8.132	125	8.132	216.667	8.132	425
	8.136	108.333	8.136	241.667	8.136	366.667
	8.14	75	8.14	216.667	8.14	358.333
	8.144	25	8.144	241.667	8.144	383.333
	8.148	100	8.148	250	8.148	350
	8.152	91.6667	8.152	233.333	8.152	366.667
	8.156	83.3333	8.156	250	8.156	408.333
	8.16	108.333	8.16	250	8.16	425
	8.164	75	8.164	258.333	8.164	383.333
	8.168	75	8.168	225	8.168	358.333
	8.172	75	8.172	225	8.172	400
	8.176	83.3333	8.176	300	8.176	400
	8.18	91.6667	8.18	225	8.18	408.333
	8.184	100	8.184	208.333	8.184	341.667
	8.188	116.667	8.188	225	8.188	391.667
	8.192	100	8.192	208.333	8.192	416.667
	8.196	58.3333	8.196	233.333	8.196	358.333
	8.2	150	8.2	200	8.2	350
	8.204	108.333	8.204	208.333	8.204	333.333
	8.208	133.333	8.208	241.667	8.208	350
	8.212	83.3333	8.212	191.667	8.212	366.667
	8.216	83.3333	8.216	233.333	8.216	425
	8.22	91.6667	8.22	208.333	8.22	375
	8.224	116.667	8.224	283.333	8.224	416.667
	8.228	75	8.228	241.667	8.228	366.667
	8.232	75	8.232	166.667	8.232	433.333
	8.236	100	8.236	200	8.236	375
	8.24	125	8.24	308.333	8.24	433.333
	8.244	108.333	8.244	200	8.244	383.333
	8.248	83.3333	8.248	216.667	8.248	350
	8.252	108.333	8.252	241.667	8.252	375
	8.256	50	8.256	200	8.256	341.667
	8.26	66.6667	8.26	250	8.26	350
	8.264	116.667	8.264	258.333	8.264	375
	8.268	100	8.268	241.667	8.268	375
	8.272	41.6667	8.272	225	8.272	383.333
	8.276	133.333	8.276	250	8.276	375
	8.28	91.6667	8.28	250	8.28	408.333
	8.284	150	8.284	208.333	8.284	375
	8.288	108.333	8.288	233.333	8.288	375
	8.292	66.6667	8.292	183.333	8.292	383.333
	8.296	66.6667	8.296	225	8.296	375
	8.3	41.6667	8.3	225	8.3	425
	8.304	58.3333	8.304	208.333	8.304	425
	8.308	66.6667	8.308	200	8.308	375
	8.312	83.3333	8.312	233.333	8.312	366.667
	8.316	158.333	8.316	225	8.316	391.667
	8.32	108.333	8.32	258.333	8.32	383.333
	8.324	141.667	8.324	191.667	8.324	391.667
	8.328	108.333	8.328	225	8.328	400
	8.332	75	8.332	183.333	8.332	408.333
	8.336	116.667	8.336	208.333	8.336	400
	8.34	58.3333	8.34	200	8.34	408.333
	8.344	83.3333	8.344	200	8.344	366.667
	8.348	66.6667	8.348	208.333	8.348	358.333
	8.352	75	8.352	241.667	8.352	441.667
	8.356	83.3333	8.356	250	8.356	375
	8.36	100	8.36	233.333	8.36	350
	8.364	100	8.364	225	8.364	358.333
	8.368	66.6667	8.368	250	8.368	391.667
	8.372	100	8.372	183.333	8.372	375
	8.376	75	8.376	250	8.376	375
	8.38	83.3333	8.38	258.333	8.38	358.333
	8.384	75	8.384	216.667	8.384	375
	8.388	91.6667	8.388	208.333	8.388	391.667
	8.392	116.667	8.392	233.333	8.392	341.667
	8.396	75	8.396	233.333	8.396	375
	8.4	125	8.4	208.333	8.4	350
	8.404	83.3333	8.404	233.333	8.404	366.667
	8.408	66.6667	8.408	208.333	8.408	391.667
	8.412	91.6667	8.412	225	8.412	391.667
	8.416	108.333	8.416	216.667	8.416	400
	8.42	108.333	8.42	191.667	8.42	358.333
	8.424	66.6667	8.424	225	8.424	383.333
	8.428	41.6667	8.428	208.333	8.428	391.667
	8.432	141.667	8.432	241.667	8.432	375
	8.436	158.333	8.436	233.333	8.436	425
	8.44	100	8.44	233.333	8.44	358.333
	8.444	66.6667	8.444	208.333	8.444	358.333
	8.448	58.3333	8.448	233.333	8.448	400
	8.452	166.667	8.452	233.333	8.452	375
	8.456	91.6667	8.456	233.333	8.456	408.333
	8.46	125	8.46	200	8.46	358.333
	8.464	91.6667	8.464	283.333	8.464	383.333
	8.468	58.3333	8.468	283.333	8.468	350
	8.472	83.3333	8.472	216.667	8.472	383.333
	8.476	116.667	8.476	291.667	8.476	366.667
	8.48	116.667	8.48	225	8.48	358.333
	8.484	75	8.484	225	8.484	341.667
	8.488	100	8.488	258.333	8.488	383.333
	8.492	116.667	8.492	266.667	8.492	400
	8.496	50	8.496	216.667	8.496	341.667
	8.5	108.333	8.5	275	8.5	400
	8.504	75	8.504	200	8.504	375
	8.508	100	8.508	216.667	8.508	433.333
	8.512	91.6667	8.512	216.667	8.512	375
	8.516	116.667	8.516	258.333	8.516	358.333
	8.52	66.6667	8.52	233.333	8.52	375
	8.524	116.667	8.524	250	8.524	366.667
	8.528	108.333	8.528	241.667	8.528	391.667
	8.532	108.333	8.532	241.667	8.532	358.333
	8.536	50	8.536	216.667	8.536	408.333
	8.54	100	8.54	250	8.54	350
	8.544	100	8.544	216.667	8.544	375
	8.548	91.6667	8.548	200	8.548	358.333
	8.552	83.3333	8.552	208.333	8.552	366.667
	8.556	91.6667	8.556	225	8.556	358.333
	8.56	133.333	8.56	233.333	8.56	383.333
	8.564	75	8.564	225	8.564	391.667
	8.568	91.6667	8.568	241.667	8.568	441.667
	8.572	191.667	8.572	258.333	8.572	375
	8.576	91.6667	8.576	225	8.576	375
	8.58	91.6667	8.58	183.333	8.58	375
	8.584	66.6667	8.584	208.333	8.584	416.667
	8.588	108.333	8.588	191.667	8.588	358.333
	8.592	91.6667	8.592	258.333	8.592	416.667
	8.596	141.667	8.596	191.667	8.596	383.333
	8.6	75	8.6	191.667	8.6	433.333
	8.604	83.3333	8.604	258.333	8.604	350
	8.608	125	8.608	216.667	8.608	391.667
	8.612	83.3333	8.612	191.667	8.612	408.333
	8.616	91.6667	8.616	233.333	8.616	425
	8.62	83.3333	8.62	266.667	8.62	366.667
	8.624	91.6667	8.624	266.667	8.624	391.667
	8.628	50	8.628	241.667	8.628	383.333
	8.632	125	8.632	266.667	8.632	391.667
	8.636	91.6667	8.636	250	8.636	358.333
	8.64	133.333	8.64	191.667	8.64	375
	8.644	75	8.644	225	8.644	391.667
	8.648	33.3333	8.648	225	8.648	391.667
	8.652	133.333	8.652	258.333	8.652	400
	8.656	58.3333	8.656	258.333	8.656	425
	8.66	66.6667	8.66	275	8.66	375
	8.664	41.6667	8.664	200	8.664	408.333
	8.668	133.333	8.668	200	8.668	425
	8.672	50	8.672	250	8.672	400
	8.676	91.6667	8.676	191.667	8.676	383.333
	8.68	75	8.68	208.333	8.68	391.667
	8.684	116.667	8.684	241.667	8.684	375
	8.688	108.333	8.688	250	8.688	383.333
	8.692	125	8.692	216.667	8.692	433.333
	8.696	66.6667	8.696	225	8.696	400
	8.7	100	8.7	275	8.7	366.667
	8.704	108.333	8.704	283.333	8.704	391.667
	8.708	66.6667	8.708	250	8.708	391.667
	8.712	91.6667	8.712	258.333	8.712	416.667
	8.716	75	8.716	191.667	8.716	350
	8.72	116.667	8.72	241.667	8.72	416.667
	8.724	100	8.724	216.667	8.724	366.667
	8.728	125	8.728	225	8.728	391.667
	8.732	83.3333	8.732	241.667	8.732	358.333
	8.736	75	8.736	266.667	8.736	366.667
	8.74	75	8.74	225	8.74	383.333
	8.744	100	8.744	233.333	8.744	400
	8.748	66.6667	8.748	225	8.748	366.667
	8.752	91.6667	8.752	216.667	8.752	408.333
	8.756	75	8.756	200	8.756	383.333
	8.76	116.667	8.76	200	8.76	375
	8.764	83.3333	8.764	200	8.764	408.333
	8.768	66.6667	8.768	225	8.768	358.333
	8.772	58.3333	8.772	208.333	8.772	408.333
	8.776	125	8.776	308.333	8.776	400
	8.78	100	8.78	216.667	8.78	408.333
	8.784	116.667	8.784	250	8.784	375
	8.788	108.333	8.788	266.667	8.788	383.333
	8.792	33.3333	8.792	225	8.792	383.333
	8.796	116.667	8.796	216.667	8.796	408.333
	8.8	141.667	8.8	266.667	8.8	383.333
	8.804	83.3333	8.804	241.667	8.804	408.333
	8.808	116.667	8.808	250	8.808	416.667
	8.812	125	8.812	241.667	8.812	375
	8.816	58.3333	8.816	266.667	8.816	366.667
	8.82	100	8.82	258.333	8.82	400
	8.824	75	8.824	250	8.824	383.333
	8.828	108.333	8.828	200	8.828	400
	8.832	25	8.832	241.667	8.832	350
	8.836	116.667	8.836	291.667	8.836	366.667
	8.84	75	8.84	266.667	8.84	383.333
	8.844	83.3333	8.844	233.333	8.844	408.333
	8.848	91.6667	8.848	225	8.848	408.333
	8.852	58.3333	8.852	233.333	8.852	416.667
	8.856	100	8.856	208.333	8.856	408.333
	8.86	108.333	8.86	216.667	8.86	358.333
	8.864	100	8.864	233.333	8.864	375
	8.868	100	8.868	275	8.868	433.333
	8.872	58.3333	8.872	283.333	8.872	433.333
	8.876	125	8.876	208.333	8.876	408.333
	8.88	116.667	8.88	291.667	8.88	383.333
	8.884	91.6667	8.884	200	8.884	383.333
	8.888	100	8.888	250	8.888	383.333
	8.892	116.667	8.892	225	8.892	416.667
	8.896	133.333	8.896	266.667	8.896	358.333
	8.9	75	8.9	233.333	8.9	458.333
	8.904	100	8.904	216.667	8.904	400
	8.908	133.333	8.908	283.333	8.908	383.333
	8.912	100	8.912	233.333	8.912	350
	8.916	108.333	8.916	241.667	8.916	391.667
	8.92	108.333	8.92	241.667	8.92	375
	8.924	108.333	8.924	241.667	8.924	408.333
	8.928	100	8.928	241.667	8.928	416.667
	8.932	83.3333	8.932	250	8.932	416.667
	8.936	83.3333	8.936	291.667	8.936	383.333
	8.94	108.333	8.94	250	8.94	391.667
	8.944	91.6667	8.944	250	8.944	375
	8.948	133.333	8.948	283.333	8.948	325
	8.952	100	8.952	241.667	8.952	375
	8.956	150	8.956	216.667	8.956	366.667
	8.96	150	8.96	258.333	8.96	383.333
	8.964	100	8.964	275	8.964	416.667
	8.968	91.6667	8.968	216.667	8.968	375
	8.972	58.3333	8.972	258.333	8.972	366.667
	8.976	150	8.976	225	8.976	400
	8.98	150	8.98	275	8.98	425
	8.984	91.6667	8.984	191.667	8.984	391.667
[truncated: 254 more rows]
